# Supplementary material
Source: PubMed Central journal article supplement (PMC2951593)
Supplement: NIHMS32141-supplement-01.pdf [file NIHMS32141-supplement-01.pdf]

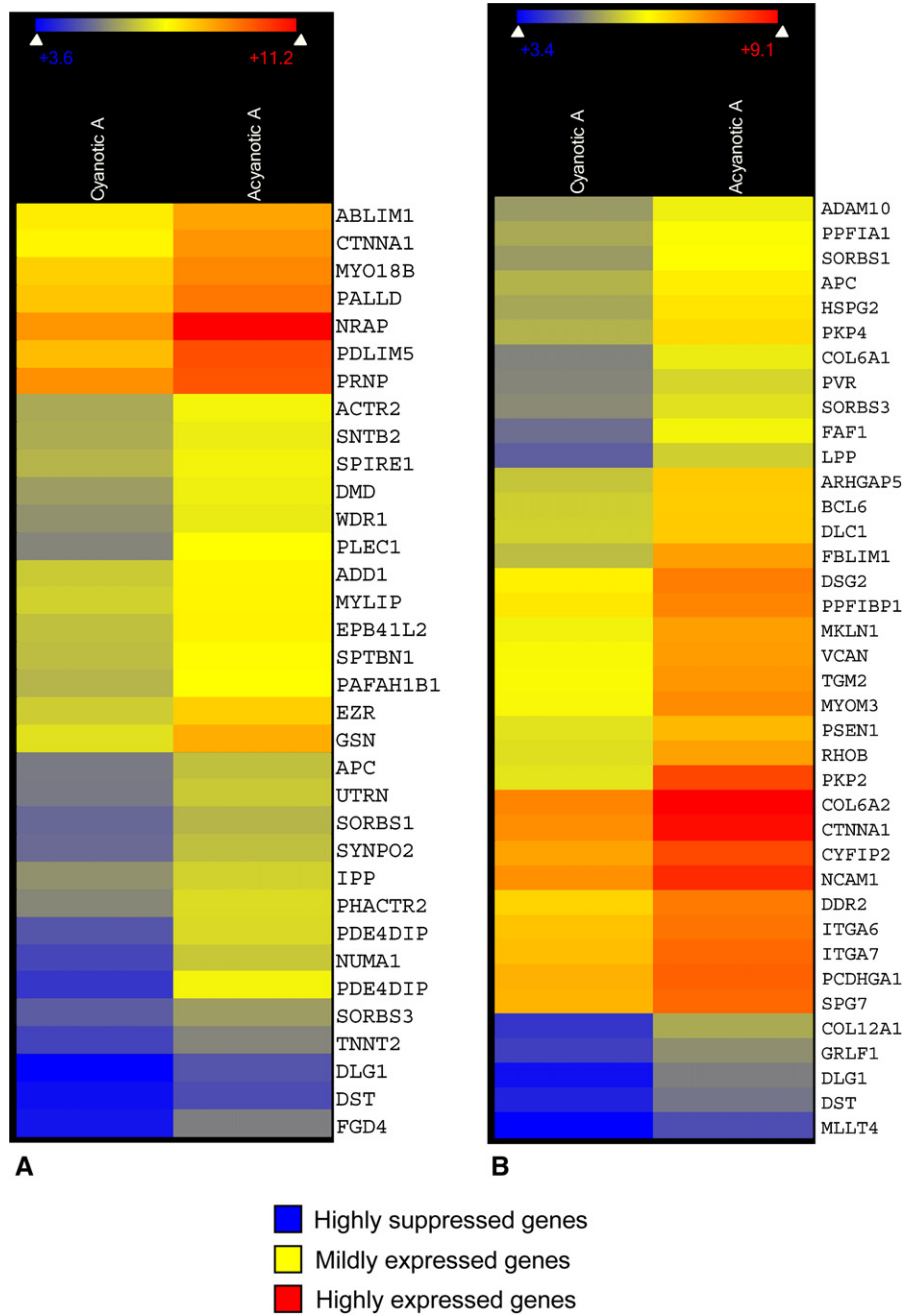

**FIGURE E1.** Heat Map illustrating the expression levels of contractile machinery genes. A, Cytoskeletal cluster. B, Cell adhesion cluster. Hierarchical clustering has been performed with ArrayStar software. A 3-color scale was used to illustrate expression level differences, with blue indicating low expression values, yellow indicating intermediately expressed genes, and red representing highly expressed genes.

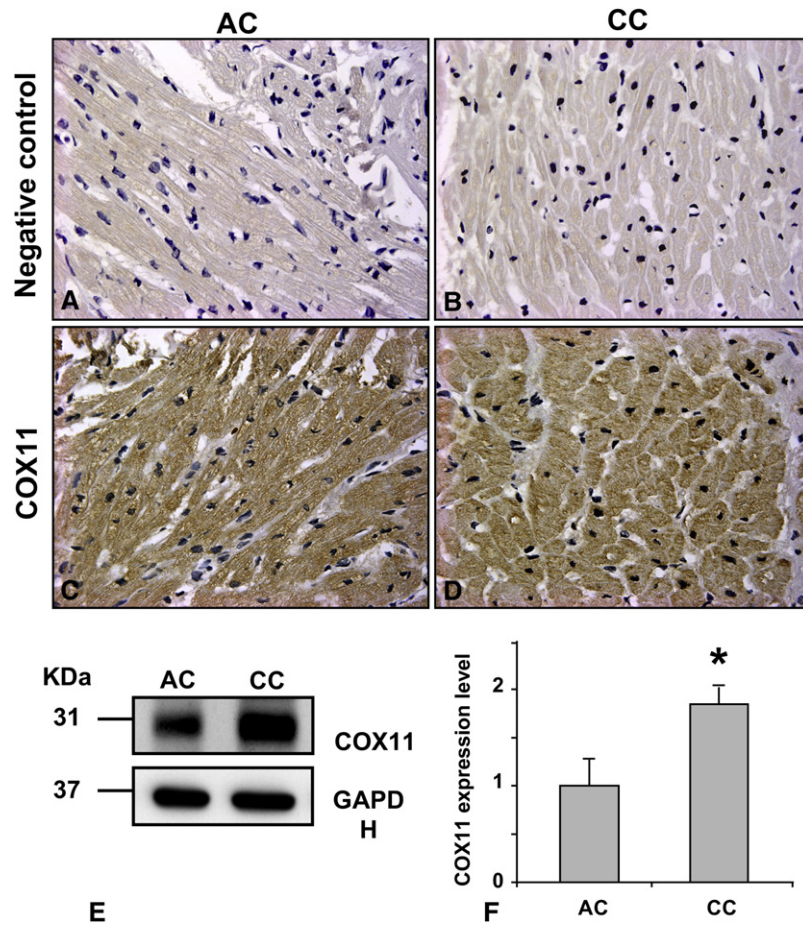

**FIGURE E2.** COX 11 protein immunostaining of paraffin-embedded heart tissue from acyanotic (C) and cyanotic (D) patients using COX11-specific antibody. 3,3'-Diaminobenzidine (DAB) staining (brown) reveals expression of COX11 in both tissues but not in control tissue (A and B). E and F, COX11 protein expression level in myocardium of acyanotic (AC) and cyanotic (CC) patients. Biopsy specimens were lysed to isolate protein content and Western blotting analysis was performed, probing for COX11 and glyceraldehyde-3-phosphate dehydrogenase (GAPDH). COX11 was significantly upregulated in cyanotic biopsy specimens compared with that seen in acyanotic specimens. COX11 bands were normalized to glyceraldehyde-3-phosphate dehydrogenase (GAPDH) levels. Data are presented as means ± standard errors of the mean. \* $P < .05$  (n = 6).

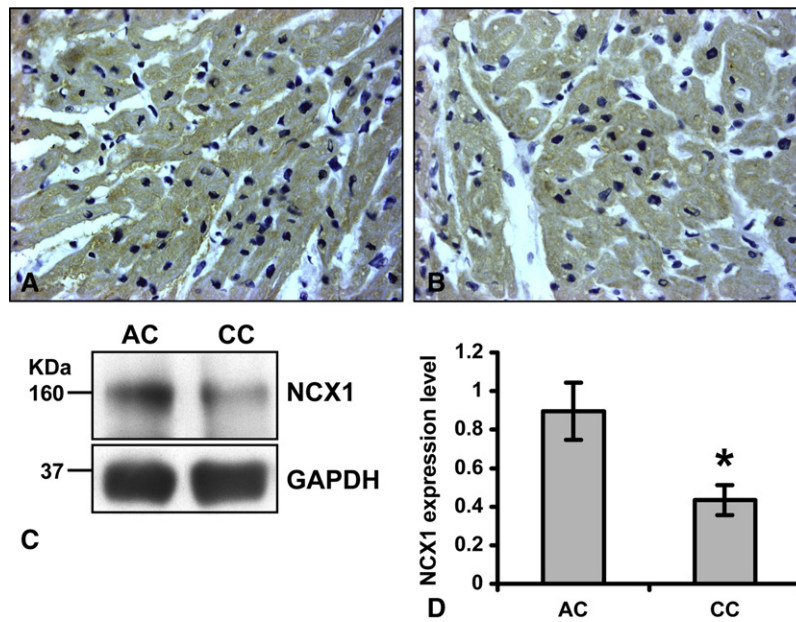

**FIGURE E3.** A and B, NCX1 protein immunostaining of paraffin-embedded heart tissue from acyanotic (A) and cyanotic (B) patients using NCX1-specific antibody. 3,3'-Diaminobenzidine (DAB) staining (brown) reveals expression of NCX1 in both tissues. C and D, NCX1 protein expression level in myocardium of acyanotic (AC) and cyanotic (CC) patients. Biopsy specimens were lysed to isolate protein content, and Western blotting analysis was performed, probing for NCX1 and glyceraldehyde-3-phosphate dehydrogenase (*GAPDH*). NCX1 was significantly downregulated in cyanotic biopsy specimens compared with acyanotic specimens. NCX1 bands were normalized to GAPDH levels. Data are presented as means ± standard errors of the mean. \* $P < .05$  (n = 4).

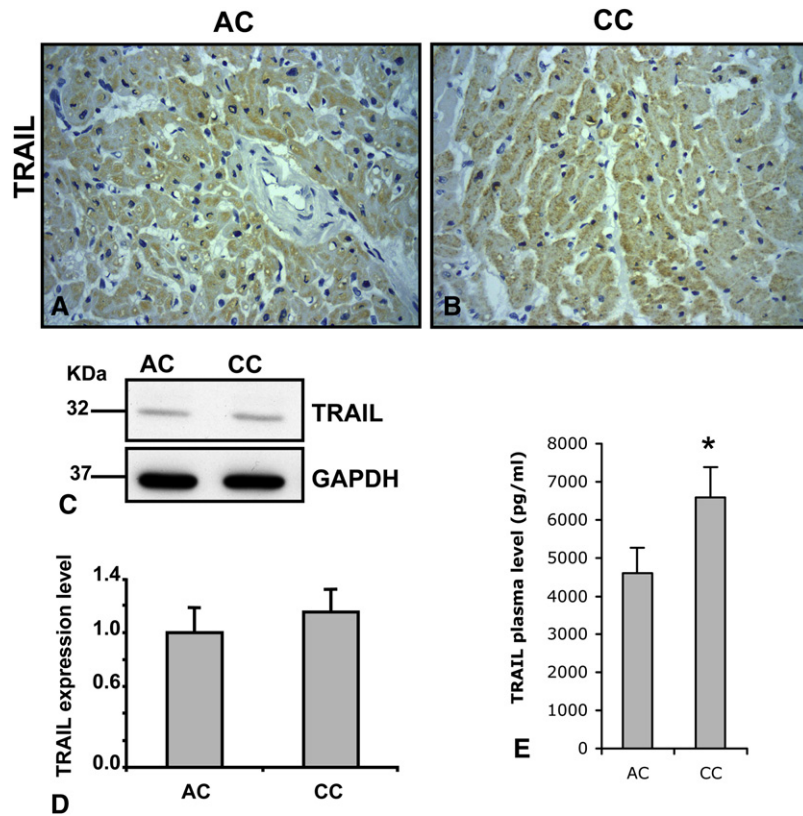

**FIGURE E4.** TRAIL protein immunostaining of paraffin-embedded heart tissue from acyanotic (A) and cyanotic (B) patients using TRAIL-specific antibody. 3,3'-Diaminobenzidine (DAB) staining (brown) reveals expression of TRAIL in both tissues. C and D, TRAIL protein expression level in myocardium of acyanotic (AC) and cyanotic (CC) patients. Biopsy specimens were lysed to isolate protein content, and Western blotting analysis was performed, probing for TRAIL and glyceraldehyde-3-phosphate dehydrogenase (GAPDH). TRAIL was not upregulated in cyanotic biopsy specimens compared with acyanotic specimens. TRAIL bands were normalized to GAPDH levels. Data are presented as means  $\pm$  standard errors of the mean (n = 6). E, Plasma levels of TRAIL in cyanotic (CC) and acyanotic (AC) children. *Solid bars* represent median protein concentration in preoperative plasma samples (in picograms per milliliter). A significantly enhanced TRAIL protein expression was observed in cyanotic samples. Data are presented as means  $\pm$  standard errors of the mean. \* $P < .05$  (n = 9–11).

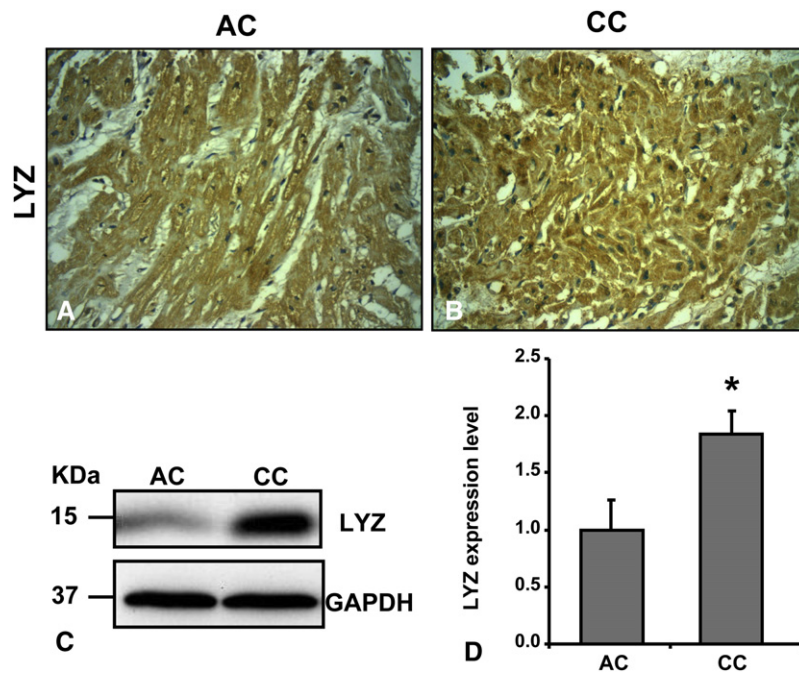

**FIGURE E5.** LYZ protein immunostaining of paraffin-embedded heart tissue from acyanotic (A) and cyanotic (B) patients using LYZ-specific antibody. 3,3'-Diaminobenzidine (DAB) staining (brown) reveals expression of LYZ in both tissues. C and D, LYZ protein expression level in myocardium of acyanotic (AC) and cyanotic (CC) patients. Biopsy specimens were lysed to isolate protein content, and Western blotting analysis was performed, probing for LYZ and glyceraldehyde-3-phosphate dehydrogenase (GAPDH). LYZ was significantly upregulated in cyanotic biopsy specimens compared with acyanotic specimens. LYZ bands were normalized to GAPDH levels. Data are presented as means  $\pm$  standard errors of the mean. \* $P < .05$  (n = 6).

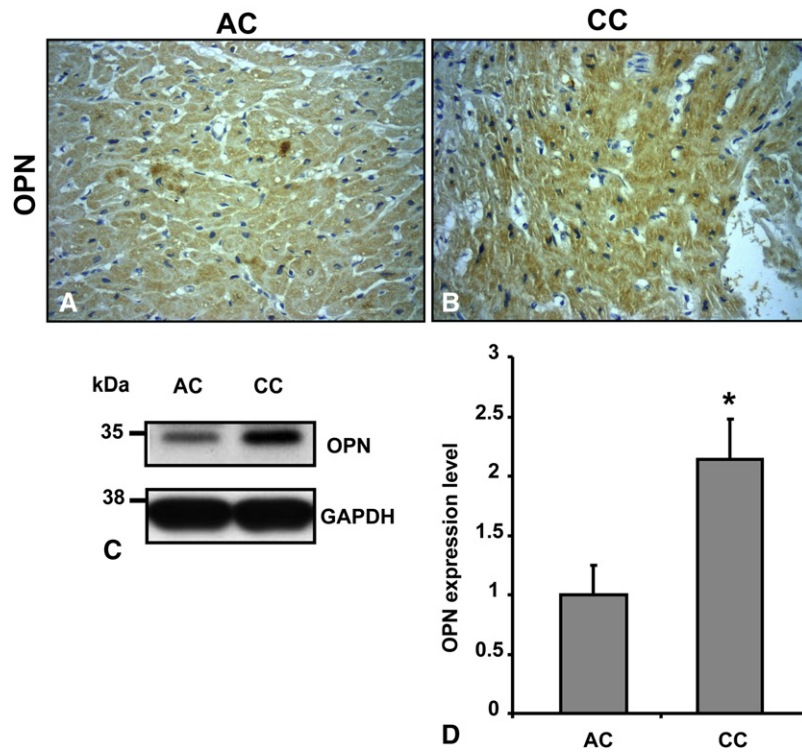

**FIGURE E6.** OPN protein immunostaining of paraffin-embedded heart tissue from acyanotic (A) and cyanotic (B) patients using OPN-specific antibody. 3,3'-Diaminobenzidine (DAB) staining (brown) reveals expression of OPN in both tissues. C and D, OPN protein expression level in myocardium of acyanotic (AC) and cyanotic (CC) patients. Biopsy specimens were lysed to isolate protein content, and Western blotting analysis was performed, probing for OPN and glyceraldehyde-3-phosphate dehydrogenase (*GAPDH*). OPN was significantly upregulated in cyanotic biopsy specimens compared with acyanotic specimens. OPN bands were normalized to GAPDH levels. Data are presented as means  $\pm$  standard errors of the mean. \* $P < .05$  (n = 6).

CHD

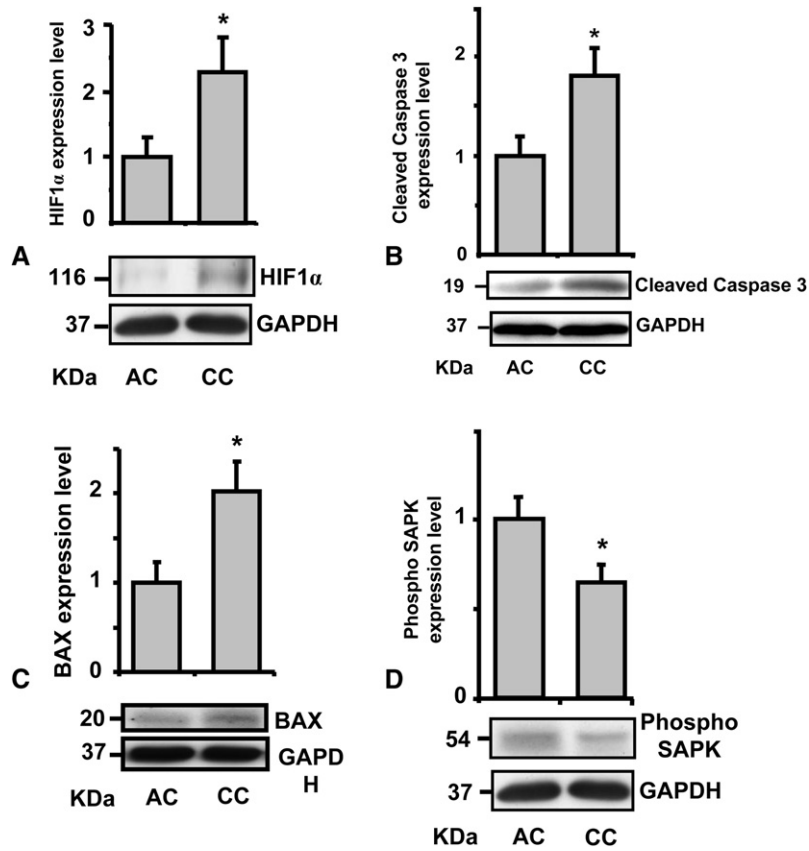

**FIGURE E7.** Functional validation of hypoxia-inducible factor 1 alpha, cleaved caspase-3, BAX, and phospho-SAPK protein levels in myocardium of acyanotic (AC) and cyanotic (CC) patients. Biopsy specimens were lysed to isolate protein content, and Western blotting analysis was performed, probing for HIF1α (A), cleaved caspase-3 (B), BAX (C), phospho-SAPK (D) and glyceraldehyde-3-phosphate dehydrogenase (GAPDH). HIF1α, cleaved caspase-3, and BAX were significantly upregulated in cyanotic compared with acyanotic biopsy specimens. Phospho-SAPK was significantly downregulated in cyanotic compared with acyanotic biopsy specimens. HIF1α, cleaved caspase-3, BAX, and phospho-SAPK bands were normalized to GAPDH levels. Data are presented as means ± standard errors of the mean. \* $P < .05$  (n = 6).

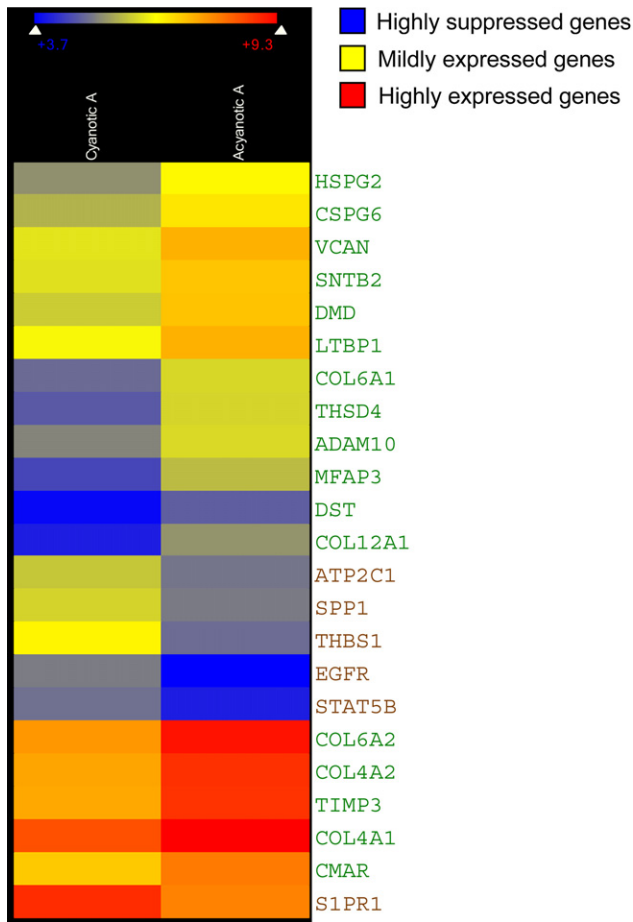

**FIGURE E8.** Heat Map illustrating the expression levels of the genes implicated in extracellular matrix. *Gene symbols in brown* represent transcripts that were upregulated in cyanotic patients, whereas *gene symbols in green* represent genes downregulated by means of cyanosis. Hierarchical clustering has been performed with ArrayStar software. A 3-color scale was used to illustrate expression level differences, with blue indicating low expression values, yellow indicating intermediately expressed genes, and red representing highly expressed genes.

CHD



**TABLE E1. Genes exhibiting 1.8-fold or greater expression change in ventricular biopsy specimens of cyanotic versus acyanotic children (upregulated genes)**

| Gene title                                                              | Symbol               | Fold     | P value | Gene ID |
|-------------------------------------------------------------------------|----------------------|----------|---------|---------|
| Lysozyme                                                                | <i>LYZ</i>           | 5.103 up | .0112   | 4069    |
| Protein phosphatase 1, catalytic subunit, beta isoform                  | <i>PPP1CB</i>        | 3.849 up | .00559  | 5500    |
| Early growth response 1                                                 | <i>EGR1</i>          | 3.498 up | .0213   | 1958    |
| RAP2C, member of RAS oncogene family                                    | <i>RAP2C</i>         | 3.364 up | .0063   | 57826   |
| Thrombospondin 1                                                        | <i>THBS1</i>         | 3.285 up | .0265   | 7057    |
| Nipsnap homolog 3A                                                      | <i>NIPSNAP3A</i>     | 3.055 up | .0229   | 25934   |
| Ubiquitin B                                                             | <i>UBB</i>           | 3.008 up | .00998  | 7314    |
| NADH dehydrogenase (ubiquinone) 1 alpha subcomplex, 5, 13 kd            | <i>NDUFA5</i>        | 2.984 up | .0187   | 4698    |
| EF-hand calcium binding domain 2                                        | <i>EFCAB2</i>        | 2.946 up | .0214   | 84288   |
| Lactamase, beta 2                                                       | <i>LACTB2</i>        | 2.815 up | .0139   | 51110   |
| Hypothetical protein DKFZp564O0523                                      | <i>DKFZP564O0523</i> | 2.769 up | .0101   | 84060   |
| Beta-1,3-N-acetylgalactosaminyltransferase 1                            | <i>B3GALNT1</i>      | 2.748 up | .0355   | 8706    |
| Actin-binding rho-activating protein                                    | <i>ABRA</i>          | 2.711 up | .0112   | 137735  |
| Eukaryotic translation initiation factor 4E                             | <i>EIF4E</i>         | 2.706 up | .0133   | 1977    |
| KIAA0776                                                                | <i>KIAA0776</i>      | 2.694 up | .0372   | 23376   |
| CDNA FLJ32626 fis, clone SYNOV1000045                                   |                      | 2.692 up | .0448   |         |
| CDNA clone IMAGE:4820809                                                |                      | 2.685 up | .0113   |         |
| COBW domain containing 1                                                | <i>CBWD1</i>         | 2.681 up | .0212   | 150472  |
| Zinc finger E-box binding homeobox 2                                    | <i>ZEB2</i>          | 2.671 up | .0129   | 9839    |
| Proteasome maturation protein                                           | <i>POMP</i>          | 2.639 up | .0107   | 51371   |
| Integral membrane protein 2A                                            | <i>ITM2A</i>         | 2.631 up | .016    | 9452    |
| Succinate-CoA ligase, GDP-forming, beta subunit                         | <i>SUCLG2</i>        | 2.629 up | .0443   | 8801    |
| Ubiquitin-specific peptidase 28                                         | <i>USP28</i>         | 2.612 up | .0124   | 57646   |
| Lysophospholipase I                                                     | <i>LYPLA1</i>        | 2.583 up | .0109   | 10434   |
| KIAA0372                                                                | <i>KIAA0372</i>      | 2.579 up | .0139   | 9652    |
| Epidermal growth factor receptor (v-erb-b oncogene)                     | <i>EGFR</i>          | 2.553 up | .0102   | 1956    |
| Family with sequence similarity 76, member B                            | <i>FAM76B</i>        | 2.552 up | .0473   | 143684  |
| FYVE, RhoGEF and PH domain containing 4                                 | <i>FGD4</i>          | 2.543 up | .0211   | 121512  |
| Hypothetical protein FLJ13611                                           | <i>FLJ13611</i>      | 2.534 up | .011    | 80006   |
| COX11 homolog, cytochrome c oxidase assembly protein                    | <i>COX11</i>         | 2.530 up | .00736  | 1353    |
| Hypothetical LOC401397                                                  | <i>LOC401397</i>     | 2.484 up | .0167   | 401397  |
| Kelch-like 20                                                           | <i>KLHL20</i>        | 2.435 up | .0142   | 27252   |
| FCF1 small subunit (SSU) processome component homolog                   | <i>FCF1</i>          | 2.431 up | .0163   | 93487   |
| Calmodulin 3 (phosphorylase kinase, delta)                              | <i>CALM3</i>         | 2.431 up | .0205   | 808     |
| Family with sequence similarity 73, member A                            | <i>FAM73A</i>        | 2.431 up | .0228   | 374986  |
| CDNA clone IMAGE:5299642                                                |                      | 2.407 up | .0432   |         |
| Proteasome (prosome, macropain) 26S subunit, ATPase, 2                  | <i>PSMC2</i>         | 2.368 up | .0135   | 5701    |
| Tumor necrosis factor (ligand) superfamily, member 10                   | <i>TNFSF10</i>       | 2.363 up | .0456   | 8743    |
| CDNA clone IMAGE:5267328                                                |                      | 2.361 up | .016    |         |
| Fibroblast growth factor 7                                              | <i>FGF7</i>          | 2.338 up | .0381   | 2252    |
| EGF-containing fibulin-like extracellular matrix protein 1              | <i>EFEMP1</i>        | 2.311 up | .0422   | 2202    |
| Cytochrome P450, family 51, subfamily A, polypeptide 1                  | <i>CYP51A1</i>       | 2.276 up | .0113   | 1595    |
| Protein phosphatase 1B (formerly 2C), magnesium-dependent, beta isoform | <i>PPM1B</i>         | 2.264 up | .00902  | 5495    |
| Lumican                                                                 | <i>LUM</i>           | 2.260 up | .025    | 4060    |
| Serpin peptidase inhibitor, clade B (ovalbumin), member 9               | <i>SERPINB9</i>      | 2.260 up | .0391   | 5272    |
| Amyotrophic lateral sclerosis 2 (juvenile)                              | <i>ALS2</i>          | 2.256 up | .0112   | 57679   |
| Rab geranylgeranyltransferase, beta subunit                             | <i>RABGGTB</i>       | 2.255 up | .00808  | 5876    |
| Ubiquitin-conjugating enzyme E2D 1 (UBC4/5 homolog, yeast)              | <i>UBE2D1</i>        | 2.243 up | .0281   | 7321    |
| Hypothetical protein LOC386597                                          | <i>LOC386597</i>     | 2.233 up | .0107   | 386597  |
| Tubulin, epsilon 1                                                      | <i>TUBE1</i>         | 2.213 up | .0182   | 51175   |
| COMM domain containing 8                                                | <i>COMMD8</i>        | 2.204 up | .016    | 54951   |
| Erythropoietin receptor                                                 | <i>EPOR</i>          | 2.190 up | .016    | 2057    |

TABLE E1. Continued

| Gene title                                                                                                    | Symbol                                | Fold     | P value | Gene ID            |
|---------------------------------------------------------------------------------------------------------------|---------------------------------------|----------|---------|--------------------|
| Adaptor-related protein complex 1, sigma 2 subunit                                                            | <i>AP1S2</i>                          | 2.186 up | .0454   | 8905               |
| Striatin, calmodulin binding protein 3                                                                        | <i>STRN3</i>                          | 2.186 up | .0243   | 29966              |
| Phosphatase and actin regulator 2                                                                             | <i>PHACTR2</i>                        | 2.181 up | .0203   | 9749               |
| Zinc-binding alcohol dehydrogenase, domain containing 1                                                       | <i>ZADH1</i>                          | 2.162 up | .0266   | 145482             |
| Tetraspanin 12                                                                                                | <i>TSPAN12</i>                        | 2.159 up | .036    | 23554              |
| Transcribed locus                                                                                             |                                       | 2.157 up | .0121   |                    |
| Ankyrin 1, erythrocytic                                                                                       | <i>ANK1</i>                           | 2.148 up | .0298   | 286                |
| Adenosine kinase                                                                                              | <i>ADK</i>                            | 2.143 up | .0113   | 132                |
| Chromosome 18 open reading frame 55                                                                           | <i>C18orf55</i>                       | 2.140 up | .0169   | 29090              |
| Solute carrier family 22, member 25                                                                           | <i>UST6</i>                           | 2.130 up | .0242   | 387601             |
| Glycine amidinotransferase (L-arginine:glycine amidinotransferase)                                            | <i>GATM</i>                           | 2.130 up | .0343   | 2628               |
| Arginyltransferase 1                                                                                          | <i>ATE1</i>                           | 2.130 up | .0291   | 11101              |
| Serum deprivation response (phosphatidylserine-binding protein)                                               | <i>SDPR</i>                           | 2.128 up | .0391   | 8436               |
| Calponin 3, acidic                                                                                            | <i>CNN3</i>                           | 2.125 up | .0407   | 1266               |
| Hypothetical protein LOC285708                                                                                | <i>LOC285708</i>                      | 2.110 up | .0154   | 285708             |
|                                                                                                               |                                       | 2.106 up | .0368   |                    |
| Chromosome 10 open reading frame 110                                                                          | <i>C10orf110</i>                      | 2.102 up | .0482   | 55853              |
| Stomatin (EPB72)-like 1                                                                                       | <i>STOML1</i>                         | 2.099 up | .011    | 9399               |
| Heterogeneous nuclear ribonucleoprotein H1 (H)                                                                | <i>HNRPH1</i>                         | 2.092 up | .0254   | 3187               |
| Solute carrier family 2 (facilitated glucose transporter), member 13                                          | <i>SLC2A13</i>                        | 2.092 up | .0237   | 114134             |
| Pallidin homolog (mouse)                                                                                      | <i>PLDN</i>                           | 2.087 up | .0138   | 26258              |
| Trinucleotide repeat containing 6B                                                                            | <i>TNRC6B</i>                         | 2.079 up | .0357   | 23112              |
| Ubiquitin-conjugating enzyme E2D 1 (UBC4/5 homolog, yeast)                                                    | <i>UBE2D1</i>                         | 2.075 up | .0342   | 7321               |
| Nuclear factor of activated T cells, cytoplasmic, calcineurin-dependent 2 interacting protein                 | <i>NFATC2IP</i>                       | 2.075 up | .0136   | 84901              |
| Syntaxin-binding protein 3                                                                                    | <i>STXBP3</i>                         | 2.073 up | .0115   | 6814               |
| Transcription elongation factor B (SIII), polypeptide 1 (15 kd, elongin C)                                    | <i>TCEB1</i>                          | 2.071 up | .0243   | 6921               |
| EF-hand domain family, member A2                                                                              | <i>EFHA2</i>                          | 2.064 up | .0142   | 286097             |
| Lyrn7 homolog (mouse)                                                                                         | <i>LYRM7</i>                          | 2.052 up | .0481   | 90624              |
| ARP3 actin-related protein 3 homolog (yeast)                                                                  | <i>ACTR3</i>                          | 2.048 up | .0298   | 10096              |
| Short coiled-coil protein                                                                                     | <i>SCOC</i>                           | 2.047 up | .0213   | 60592              |
| Ribosomal protein L15//similar to ribosomal protein L15                                                       | <i>RPL15</i>                          | 2.047 up | .0212   | 728088             |
| Hypothetical LOC441642                                                                                        | <i>LOC441642</i>                      | 2.046 up | .0159   | 441642             |
| CDNA clone IMAGE:4794011                                                                                      |                                       | 2.043 up | .0237   |                    |
| <i>Homo sapiens</i> , clone IMAGE:4480721, mRNA                                                               |                                       | 2.043 up | .0448   |                    |
| Chromosome 8 open reading frame 4                                                                             | <i>C8orf4</i>                         | 2.042 up | .0388   | 56892              |
| Polymerase (RNA) II (DNA directed) polypeptide K, 7.0 kd                                                      | <i>POLR2K</i>                         | 2.042 up | .0176   | 5440               |
| PRO1268 protein                                                                                               | <i>PRO1268</i>                        | 2.040 up | .0237   | 29006              |
| Sarcolemma-associated protein                                                                                 | <i>SLMAP</i>                          | 2.038 up | .0169   | 7871               |
| Glyceraldehyde-3-phosphate dehydrogenase-like 19//similar to glyceraldehyde-3-phosphate dehydrogenase (GAPDH) | <i>GAPDHL19//</i><br><i>LOC732268</i> | 2.036 up | .0153   | 442262//<br>732268 |
| Eukaryotic translation initiation factor 4E                                                                   | <i>EIF4E</i>                          | 2.033 up | .0264   | 1977               |
| WD repeat and SOCS box-containing 2                                                                           | <i>WSB2</i>                           | 2.031 up | .0371   | 55884              |
| CDNA FLJ32691 fis, clone TESTI2000221                                                                         |                                       | 2.022 up | .00678  |                    |
| COMM domain containing 10                                                                                     | <i>COMMD10</i>                        | 2.020 up | .0196   | 51397              |
| Zinc finger protein, X-linked                                                                                 | <i>ZFX</i>                            | 2.014 up | .0112   | 7543               |
| Ribosomal protein L23a pseudogene 7                                                                           | <i>RPL23AP7</i>                       | 2.011 up | .0106   | 118433             |
| SH3 domain-binding glutamic acid-rich protein like                                                            | <i>SH3BGRL</i>                        | 2.004 up | .0214   | 6451               |
| p21 (CDKN1A)-activated kinase 2                                                                               | <i>PAK2</i>                           | 2.002 up | .0114   | 5062               |
| Copine IV                                                                                                     | <i>CPNE4</i>                          | 2.000 up | .0172   | 131034             |

TABLE E1. Continued

| Gene title                                                                                    | Symbol                   | Fold     | P value | Gene ID       |
|-----------------------------------------------------------------------------------------------|--------------------------|----------|---------|---------------|
| NLR family, pyrin domain containing 1                                                         | <i>NLRP1</i>             | 1.999 up | .0303   | 22861         |
| X-prolyl aminopeptidase (aminopeptidase P) 3, putative                                        | <i>XPNPEP3</i>           | 1.998 up | .0379   | 63929         |
| Ribosomal protein L37a                                                                        | <i>RPL37A</i>            | 1.997 up | .035    | 6168          |
| Protein tyrosine phosphatase type IVA, member 1                                               | <i>PTP4A1</i>            | 1.989 up | .0175   | 7803          |
| CDNA FLJ30565 fis, clone BRAWH2005008                                                         |                          | 1.988 up | .0169   |               |
| Basic leucine zipper nuclear factor 1 (JEM-1)                                                 | <i>BLZF1</i>             | 1.987 up | .0405   | 8548          |
| Karyopherin alpha 2 (RAG cohort 1, importin alpha 1)                                          | <i>KPNA2</i>             | 1.986 up | .0242   | 3838          |
| Transcribed locus                                                                             |                          | 1.982 up | .0437   |               |
| Insulin-like growth factor binding protein 7                                                  | <i>IGFBP7</i>            | 1.981 up | .0404   | 3490          |
| Centrosomal protein 170 kd                                                                    | <i>CEP170</i>            | 1.977 up | .0458   | 9859          |
| B-cell chronic lymphocytic leukemia/lymphoma 10                                               | <i>BCL10</i>             | 1.964 up | .0237   | 8915          |
| Poly(A) binding protein interacting protein 1                                                 | <i>PAIP1</i>             | 1.962 up | .0347   | 10605         |
| Mediterranean fever                                                                           | <i>MEFV</i>              | 1.957 up | .0137   | 4210          |
| Similar to 60S ribosomal protein L35                                                          | <i>LOC643653</i>         | 1.957 up | .0222   | 643653        |
| Annexin A7                                                                                    | <i>ANXA7</i>             | 1.955 up | .012    | 310           |
| Folliculin                                                                                    | <i>FLCN</i>              | 1.952 up | .0255   | 201163        |
| Septin 7                                                                                      | <i>SEPT7</i>             | 1.948 up | .0483   | 989           |
| TM2 domain containing 1                                                                       | <i>TM2D1</i>             | 1.945 up | .0157   | 83941         |
| CD8a molecule                                                                                 | <i>CD8A</i>              | 1.942 up | .0186   | 925           |
| Secreted phosphoprotein 1 (osteopontin, bone sialoprotein I, early T-lymphocyte activation 1) | <i>SPP1</i>              | 1.941 up | .0115   | 6696          |
| Selenoprotein P, plasma, 1                                                                    | <i>SEPP1</i>             | 1.937 up | .0206   | 6414          |
| Transmembrane protein 123                                                                     | <i>TMEM123</i>           | 1.935 up | .011    | 114908        |
| CDNA clone IMAGE:5273964                                                                      |                          | 1.935 up | .0483   |               |
| Src kinase-associated phosphoprotein 2                                                        | <i>SKAP2</i>             | 1.934 up | .0406   | 8935          |
| Cyclin-dependent kinase inhibitor 2C (p18, inhibits CDK4)                                     | <i>CDKN2C</i>            | 1.933 up | .0125   | 1031          |
| Transcribed locus                                                                             |                          | 1.927 up | .024    |               |
| Spermidine/spermine N1-acetyltransferase 1                                                    | <i>SAT1</i>              | 1.925 up | .0162   | 6303          |
| THAP domain containing 5                                                                      | <i>THAP5</i>             | 1.924 up | .0113   | 168451        |
| Actin-like 6A                                                                                 | <i>ACTL6A</i>            | 1.923 up | .0182   | 86            |
| SMT3 suppressor of mif two 3 homolog 1 ( <i>S cerevisiae</i> )                                | <i>SUMO1</i>             | 1.922 up | .00972  | 7341          |
| MAD2 mitotic arrest deficient-like 1 (yeast)                                                  | <i>MAD2L1</i>            | 1.922 up | .0114   | 4085          |
| MANSC domain containing 1                                                                     | <i>MANSC1</i>            | 1.921 up | .0232   | 54682         |
| Endothelial differentiation, sphingolipid G protein-coupled receptor, 1                       | <i>EDG1</i>              | 1.915 up | .0242   | 1901          |
| Wingless-type MMTV integration site family, member 6                                          | <i>WNT6</i>              | 1.914 up | .0387   | 7475          |
| Carboxypeptidase E                                                                            | <i>CPE</i>               | 1.914 up | .0236   | 1363          |
| Transcribed locus                                                                             |                          | 1.909 up | .0315   |               |
| Interleukin 33                                                                                | <i>IL33</i>              | 1.901 up | .0456   | 90865         |
| OMA1 homolog, zinc metallopeptidase ( <i>S cerevisiae</i> )                                   | <i>OMA1</i>              | 1.899 up | .0263   | 115209        |
| Calreticulin                                                                                  | <i>CALR</i>              | 1.898 up | .0443   | 811           |
| Clone 114 tumor rejection antigen                                                             |                          | 1.895 up | .0405   |               |
| Solute carrier family 12 (sodium/potassium/chloride transporters), member 2                   | <i>SLC12A2</i>           | 1.893 up | .0158   | 6558          |
| EF-hand domain family, member A1                                                              | <i>EFHA1</i>             | 1.893 up | .0217   |               |
| Ribosomal protein L38                                                                         | <i>RPL38</i>             | 1.892 up | .0243   | 221154        |
| <i>Homo sapiens</i> , clone IMAGE:5440917, mRNA                                               |                          | 1.890 up | .0253   | 6169          |
| Yip1 domain family, member 4                                                                  | <i>YIPF4</i>             | 1.889 up | .0374   |               |
| Guanine nucleotide binding protein (G protein), gamma 10//hypothetical protein LOC552891      | <i>GNG10///LOC552891</i> | 1.887 up | .0146   | 84272         |
| Peroxisomal biogenesis factor 7                                                               | <i>PEX7</i>              | 1.884 up | .0224   | 2790///552891 |
| Signal transducer and activator of transcription 5B                                           | <i>STAT5B</i>            | 1.881 up | .0135   | 5191          |
| 3'(2'), 5'-Bisphosphate nucleotidase 1                                                        | <i>BPNT1</i>             | 1.881 up | .0195   | 6777          |
|                                                                                               |                          | 1.876 up | .0281   | 10380         |

TABLE E1. Continued

| Gene title                                                                                                                                            | Symbol                  | Fold     | P value | Gene ID       |
|-------------------------------------------------------------------------------------------------------------------------------------------------------|-------------------------|----------|---------|---------------|
| Inhibitor of DNA binding 2, dominant negative<br>helix-loop-helix protein//inhibitor of DNA binding<br>2B, dominant negative helix-loop-helix protein | <i>ID2///ID2B</i>       | 1.875 up | .0448   | 3398///84099  |
| Eukaryotic translation initiation factor 1A, X-linked                                                                                                 | <i>EIF1AX</i>           | 1.866 up | .0317   | 1964          |
| OTU domain containing 6B                                                                                                                              | <i>OTUD6B</i>           | 1.865 up | .0325   | 51633         |
| RAB12, member RAS oncogene family                                                                                                                     | <i>RAB12</i>            | 1.864 up | .024    | 201475        |
| Late cornified envelope 1E                                                                                                                            | <i>LCE1E</i>            | 1.862 up | .00469  | 353135        |
| RNA binding motif (RNP1, RRM) protein 3                                                                                                               | <i>RBM3</i>             | 1.862 up | .0125   | 5935          |
| Thiopurine S-methyltransferase                                                                                                                        | <i>TPMT</i>             | 1.858 up | .0232   | 7172          |
| Mitochondrial ribosomal protein L50                                                                                                                   | <i>MRPL50</i>           | 1.856 up | .0389   | 54534         |
| Hydroxysteroid dehydrogenase like 2                                                                                                                   | <i>HSDL2</i>            | 1.853 up | .0352   | 84263         |
| CDNA clone IMAGE:4830861                                                                                                                              |                         | 1.849 up | .0181   |               |
| Methylenetetrahydrofolate dehydrogenase<br>(NADP <sup>+</sup> dependent) 2–like                                                                       | <i>MTHFD2L</i>          | 1.847 up | .0293   | 441024        |
| Jagged 1 (Alagille syndrome)                                                                                                                          | <i>JAG1</i>             | 1.847 up | .0319   | 182           |
|                                                                                                                                                       |                         | 1.847 up | .0111   |               |
| Myozenin 2                                                                                                                                            | <i>MYOZ2</i>            | 1.843 up | .032    | 51778         |
| Family with sequence similarity 115, member A                                                                                                         | <i>FAM115A</i>          | 1.842 up | .0368   | 9747          |
| Cysteine and histidine–rich domain<br>(CHORD)–containing 1                                                                                            | <i>CHORDC1</i>          | 1.841 up | .0109   | 26973         |
| ATPase, Ca <sup>++</sup> transporting, type 2C, member 1                                                                                              | <i>ATP2C1</i>           | 1.841 up | .0435   | 27032         |
| Copine IV                                                                                                                                             | <i>CPNE4</i>            | 1.841 up | .0149   | 131034        |
| NLR family, pyrin domain containing 1                                                                                                                 | <i>NLRP1</i>            | 1.834 up | .0241   | 22861         |
| Basic transcription factor 3                                                                                                                          | <i>BTF3</i>             | 1.834 up | .0104   | 689           |
| Golgi transport 1 homolog B ( <i>S cerevisiae</i> )                                                                                                   | <i>GOLT1B</i>           | 1.833 up | .0312   | 51026         |
| Transcribed locus                                                                                                                                     |                         | 1.832 up | .0171   |               |
| Hypothetical protein FLJ22222                                                                                                                         | <i>FLJ22222</i>         | 1.829 up | .0115   | 79701         |
| Dihydropyrimidine dehydrogenase                                                                                                                       | <i>DPYD</i>             | 1.826 up | .0395   | 1806          |
| Chromosome 5 open reading frame 33                                                                                                                    | <i>C5orf33</i>          | 1.825 up | .0109   | 133686        |
| Epidermal growth factor receptor (erythroblastic<br>leukemia viral (v-erb-b) oncogene homolog, avian)                                                 | <i>EGFR</i>             | 1.824 up | .0152   | 1956          |
| Jerky homolog–like (mouse)                                                                                                                            | <i>JRKL</i>             | 1.824 up | .0387   | 8690          |
| Sphingomyelin synthase 1                                                                                                                              | <i>SGMS1</i>            | 1.824 up | .0109   | 259230        |
| Zinc finger protein 654                                                                                                                               | <i>ZNF654</i>           | 1.823 up | .0367   | 55279         |
| Transcribed locus (serine/threonine kinase 17B)<br>(apoptosis-inducing)                                                                               | <i>STK17B</i>           | 1.819 up | .0236   |               |
| Gap junction protein, beta 4, 30.3 kd                                                                                                                 | <i>GJB4</i>             | 1.814 up | .032    | 127534        |
| Sp3 transcription factor                                                                                                                              | <i>SP3</i>              | 1.813 up | .0124   | 6670          |
| Leucine-rich repeat containing 25                                                                                                                     | <i>LRRC25</i>           | 1.813 up | .028    | 126364        |
| Transmembrane and tetratricopeptide repeat containing 3                                                                                               | <i>TMTC3</i>            | 1.813 up | .0209   | 160418        |
| Nucleosome assembly protein 1–like 1                                                                                                                  | <i>NAP1L1</i>           | 1.812 up | .0266   | 4673          |
| Fibrinogen-like 2                                                                                                                                     | <i>FGL2</i>             | 1.812 up | .0191   | 10875         |
| Zinc finger protein 552                                                                                                                               | <i>ZNF552</i>           | 1.808 up | .0125   | 79818         |
| Hypothetical gene supported by AK023501                                                                                                               | <i>FLJ13439</i>         | 1.808 up | .0206   | 399876        |
| Full-length insert cDNA clone ZD82B02                                                                                                                 |                         | 1.807 up | .0197   |               |
| Mesenchymal stem cell protein DSC96                                                                                                                   |                         | 1.805 up | .034    |               |
| Apolipoprotein B mRNA editing enzyme, catalytic<br>polypeptide–like 3G                                                                                | <i>APOBEC3G</i>         | 1.803 up | .0176   | 60489         |
| Eukaryotic translation initiation factor 1A,<br>X-linked//eukaryotic translation initiation<br>factor 1A pseudogene 1                                 | <i>EIF1AP1///EIF1AX</i> | 1.803 up | .0298   | 1964///280661 |
| GULP, engulfment adaptor PTB domain containing 1                                                                                                      | <i>GULP1</i>            | 1.801 up | .0437   | 51454         |

**TABLE E2. Genes exhibiting 1.8-fold or greater expression change in ventricular biopsy specimens of cyanotic versus acyanotic children (downregulated genes)**

| Gene title                                                     | Symbol          | Fold       | P value | Gene ID |
|----------------------------------------------------------------|-----------------|------------|---------|---------|
| Oxoglutarate (alpha-ketoglutarate) dehydrogenase (lipoamide)   | <i>OGDH</i>     | 6.227 down | .0218   | 4967    |
| Nebulin-related anchoring protein                              | <i>NRAP</i>     | 5.878 down | .0154   | 4892    |
| Plakophilin 2                                                  | <i>PKP2</i>     | 5.058 down | .0124   | 5318    |
| Mitofusin 2                                                    | <i>MFN2</i>     | 4.453 down | .0216   | 9927    |
| Glucosamine (N-acetyl)-6-sulfatase                             | <i>GNS</i>      | 4.439 down | .0136   | 2799    |
| AHNAK nucleoprotein                                            | <i>AHNAK</i>    | 4.417 down | .011    | 79026   |
| Solute carrier family 8 (sodium/calcium exchanger), member 1   | <i>SLC8A1</i>   | 4.284 down | .00929  | 6546    |
| Coatmer protein complex, subunit alpha                         | <i>COPA</i>     | 4.221 down | .0222   | 1314    |
| Cardiomyopathy-associated 5                                    | <i>CMYA5</i>    | 4.185 down | .0118   | 202333  |
| Phosphodiesterase 4D-interacting protein (myomegalin)          | <i>PDE4DIP</i>  | 3.875 down | .0114   | 9659    |
| Nuclear mitotic apparatus protein 1                            | <i>NUMA1</i>    | 3.768 down | .0116   | 4926    |
| SET domain containing 5                                        | <i>SETD5</i>    | 3.652 down | .0124   | 55209   |
| Forkhead box O3                                                | <i>FOXO3</i>    | 3.606 down | .0271   | 2309    |
| Solute carrier family 39 (zinc transporter), member 14         | <i>SLC39A14</i> | 3.589 down | .0199   | 23516   |
| Plectin 1, intermediate filament binding protein 500 kd        | <i>PLEC1</i>    | 3.542 down | .0228   | 5339    |
| Zinc finger protein 36, C3H type-like 2                        | <i>ZFP36L2</i>  | 3.495 down | .0347   | 678     |
| Homeodomain interacting protein kinase 3                       | <i>HIPK3</i>    | 3.485 down | .0121   | 10114   |
| Chromosome 19 open reading frame 6                             | <i>C19orf6</i>  | 3.457 down | .0113   | 91304   |
| Filamin binding LIM protein 1                                  | <i>FBLIM1</i>   | 3.429 down | .0314   | 54751   |
| Interleukin 6 signal transducer (gp130, oncostatin M receptor) | <i>IL6ST</i>    | 3.397 down | .0114   | 3572    |
| YTH domain family, member 3                                    | <i>YTHDF3</i>   | 3.396 down | .0146   | 253943  |
| DEAD (Asp-Glu-Ala-Asp) box polypeptide 42                      | <i>DDX42</i>    | 3.385 down | .0124   | 11325   |
| AF4/FMR2 family, member 4                                      | <i>AFF4</i>     | 3.372 down | .0136   | 27125   |
| DEAH (Asp-Glu-Ala-His) box polypeptide 9                       | <i>DHX9</i>     | 3.350 down | .011    | 1660    |
| WD repeat domain 68                                            | <i>WDR68</i>    | 3.246 down | .0131   | 10238   |
| ATPase type 13A3                                               | <i>ATP13A3</i>  | 3.204 down | .00672  | 79572   |
| Sec61 alpha 1 subunit ( <i>S cerevisiae</i> )                  | <i>SEC61A1</i>  | 3.183 down | .0175   | 29927   |
| Chaperone, ABC1 activity of bc1 complex homolog                | <i>CABC1</i>    | 3.182 down | .0219   | 56997   |
| Signal-induced proliferation-associated 1 like 2               | <i>SIPA1L2</i>  | 3.164 down | .0183   | 57568   |
| Gelsolin (amyloidosis, Finnish type)                           | <i>GSN</i>      | 3.155 down | .0125   | 2934    |
| A kinase (PRKA) anchor protein 6                               | <i>AKAP6</i>    | 3.123 down | .00579  | 9472    |
| Peroxisome proliferator-activated receptor alpha               | <i>PPARA</i>    | 3.107 down | .03     | 5465    |
| PDZ and LIM domain 5                                           | <i>PDLIM5</i>   | 3.101 down | .0125   | 10611   |
| Tetratricopeptide repeat domain 3                              | <i>TTC3</i>     | 3.088 down | .0109   | 7267    |
| Sp1 transcription factor                                       | <i>SPI1</i>     | 3.080 down | .0146   | 6667    |
| Trafficking protein, kinesin binding 1                         | <i>TRAK1</i>    | 3.074 down | .0224   | 22906   |
| Inositol polyphosphate-5-phosphatase, 40 kd                    | <i>INPP5A</i>   | 3.072 down | .0145   | 3632    |
| Phosphodiesterase 3A, cGMP-inhibited                           | <i>PDE3A</i>    | 3.069 down | .00601  | 5139    |
| Suppressor of Ty 16 homolog ( <i>S cerevisiae</i> )            | <i>SUPT16H</i>  | 3.057 down | .0187   | 11198   |
| Nucleoporin 62 kd                                              | <i>NUP62</i>    | 3.054 down | .0161   | 23636   |
| Proteasome (prosome, macropain) activator subunit 4            | <i>PSME4</i>    | 3.047 down | .0113   | 23198   |
| FYVE, RhoGEF and PH domain containing 4                        | <i>FGD4</i>     | 3.043 down | .00671  | 121512  |
| ELKS/RAB6-interacting/CAST family member 1                     | <i>ERC1</i>     | 3.033 down | .0219   | 23085   |
| PRP6 pre-mRNA processing factor 6 homolog                      | <i>PRPF6</i>    | 3.029 down | .0125   | 24148   |
| Collagen, type VI, alpha 1                                     | <i>COL6A1</i>   | 3.000 down | .00664  | 1291    |
| Myotubularin related protein 1                                 | <i>MTMR1</i>    | 2.983 down | .00996  | 8776    |
| CDNA FLJ38472 fis, clone FEBRA2022148                          |                 | 2.981 down | .0437   |         |
| Transformation/transcription domain-associated protein         | <i>TRRAP</i>    | 2.973 down | .0136   | 8295    |
| Ubiquitination factor E4B (UFD2 homolog, yeast)                | <i>UBE4B</i>    | 2.970 down | .0116   | 10277   |
| Myeloid cell leukemia sequence 1 (BCL2-related)                | <i>MCL1</i>     | 2.967 down | .0218   | 4170    |
| ATPase, Ca <sup>++</sup> transporting, plasma membrane 4       | <i>ATP2B4</i>   | 2.957 down | .0121   | 493     |

TABLE E2. Continued

| Gene title                                                                                           | Symbol         | Fold       | P value | Gene ID |
|------------------------------------------------------------------------------------------------------|----------------|------------|---------|---------|
| Filamin A interacting protein 1                                                                      | <i>FILIP1</i>  | 2.950 down | .0066   | 27145   |
| Ribosomal protein S23                                                                                | <i>RPS23</i>   | 2.945 down | .0156   | 6228    |
| Carboxypeptidase D                                                                                   | <i>CPD</i>     | 2.937 down | .0137   | 1362    |
| F-box and WD repeat domain containing 11                                                             | <i>FBXW11</i>  | 2.925 down | .0112   | 23291   |
| LAG1 homolog, ceramide synthase 6                                                                    | <i>LASS6</i>   | 2.914 down | .0366   | 253782  |
| SWI/SNF related, matrix associated, actin dependent<br>regulator of chromatin, subfamily a, member 2 | <i>SMARCA2</i> | 2.905 down | .0111   | 6595    |
| Sorbin and SH3 domain containing 1                                                                   | <i>SORBS1</i>  | 2.894 down | .0176   | 10580   |
| Guanine nucleotide binding protein (G protein), alpha 13                                             | <i>GNAI3</i>   | 2.865 down | .0241   | 10672   |
| SCY1-like 2 ( <i>S cerevisiae</i> )                                                                  | <i>SCYL2</i>   | 2.852 down | .0119   | 55681   |
| Fas (TNFRSF6) associated factor 1                                                                    | <i>FAF1</i>    | 2.819 down | .0139   | 11124   |
| Ezrin                                                                                                | <i>EZR</i>     | 2.818 down | .0295   | 7430    |
| Zinc finger protein 672                                                                              | <i>ZNF672</i>  | 2.814 down | .0144   | 79894   |
| GATA binding protein 4                                                                               | <i>GATA4</i>   | 2.805 down | .0212   | 2626    |
| Phosphodiesterase 1C, calmodulin-dependent 70 kd                                                     | <i>PDE1C</i>   | 2.803 down | .0109   | 5137    |
| Fibroblast growth factor receptor 1                                                                  | <i>FGFR1</i>   | 2.800 down | .0132   | 2260    |
| Muscleblind-like 2 ( <i>Drosophila</i> )                                                             | <i>MBNL2</i>   | 2.780 down | .0244   | 10150   |
| Ubiquitin protein ligase E3 component n-recogin 1                                                    | <i>UBR1</i>    | 2.771 down | .0253   | 197131  |
| Sodium channel, voltage-gated, type VII, alpha                                                       | <i>SCN7A</i>   | 2.769 down | .0113   | 6332    |
| Collagen, type VI, alpha 2                                                                           | <i>COL6A2</i>  | 2.742 down | .0112   | 1292    |
| Myelin basic protein                                                                                 | <i>MBP</i>     | 2.742 down | .0103   | 4155    |
| Eukaryotic translation initiation factor 4 gamma, 1                                                  | <i>EIF4G1</i>  | 2.740 down | .0125   | 1981    |
| Exportin 7                                                                                           | <i>XPO7</i>    | 2.736 down | .0112   | 23039   |
| Endothelial PAS domain protein 1                                                                     | <i>EPAS1</i>   | 2.725 down | .0232   | 2034    |
| MutS homolog 6 ( <i>E coli</i> )                                                                     | <i>MSH6</i>    | 2.724 down | .0129   | 2956    |
| Transforming growth factor, beta receptor II (70/80 kd)                                              | <i>TGFBR2</i>  | 2.715 down | .0124   | 7048    |
| Gamma-aminobutyric acid (GABA) A receptor, beta 1                                                    | <i>GABRB1</i>  | 2.710 down | .0311   | 2560    |
| Pleckstrin homology-like domain, family B, member 2                                                  | <i>PHLDB2</i>  | 2.706 down | .0174   | 90102   |
| Catenin (cadherin-associated protein), alpha 1, 102 kd                                               | <i>CTNNA1</i>  | 2.703 down | .0228   | 1495    |
| Carboxyl ester lipase (bile salt-stimulated lipase)                                                  | <i>CEL</i>     | 2.700 down | .0449   | 1056    |
| Prune homolog                                                                                        | <i>PRUNE</i>   | 2.678 down | .0233   | 58497   |
| BCL2-like 1                                                                                          | <i>BCL2L1</i>  | 2.674 down | .0329   | 598     |
| Solute carrier family 16, member 1 (monocarboxylic<br>acid transporter 1)                            | <i>SLC16A1</i> | 2.672 down | .0128   | 6566    |
| CDNA FLJ38048 fis, clone CTONG2014264//CDNA<br>FLJ39067 fis, clone NT2RP7014910                      |                | 2.668 down | .0154   |         |
| ADP-ribosylation factor guanine nucleotide-exchange factor 2                                         | <i>ARFGEF2</i> | 2.654 down | .0168   | 10564   |
| Chromosome 9 open reading frame 5                                                                    | <i>C9orf5</i>  | 2.650 down | .01     | 23731   |
| Zinc finger, MYND domain containing 11                                                               | <i>ZMYND11</i> | 2.635 down | .011    | 10771   |
| Ras homolog gene family, member B                                                                    | <i>RHOB</i>    | 2.634 down | .0488   | 388     |
| Kringle containing transmembrane protein 1                                                           | <i>KREMEN1</i> | 2.620 down | .0448   | 83999   |
| F-box protein 38                                                                                     | <i>FBXO38</i>  | 2.617 down | .0125   | 81545   |
| Secretory carrier membrane protein 1                                                                 | <i>SCAMP1</i>  | 2.616 down | .011    | 9522    |
| Putative homeodomain transcription factor 2                                                          | <i>PHTF2</i>   | 2.605 down | .0178   | 57157   |
| Spastic paraplegia 7                                                                                 | <i>SPG7</i>    | 2.598 down | .0451   | 6687    |
| Membrane protein, palmitoylated 5 (MAGUK p55<br>subfamily member 5)                                  | <i>MPP5</i>    | 2.595 down | .0103   | 64398   |
| BCL2-associated transcription factor 1                                                               | <i>BCLAF1</i>  | 2.585 down | .0138   | 9774    |
| Nuclear receptor coactivator 2                                                                       | <i>NCOA2</i>   | 2.580 down | .0116   | 10499   |
| Myomesin family, member 3                                                                            | <i>MYOM3</i>   | 2.579 down | .0346   | 127294  |
| Forkhead box N3                                                                                      | <i>FOXN3</i>   | 2.573 down | .0118   | 1112    |
| Blood vessel epicardial substance                                                                    | <i>BVES</i>    | 2.570 down | .0295   | 11149   |
| Family with sequence similarity 62 (C2 domain containing)<br>member B                                | <i>FAM62B</i>  | 2.569 down | .0134   | 57488   |

TABLE E2. Continued

| Gene title                                                                                  | Symbol         | Fold       | P value | Gene ID |
|---------------------------------------------------------------------------------------------|----------------|------------|---------|---------|
| Procollagen-proline, 2-oxoglutarate 4-dioxygenase (proline 4-hydroxylase), beta polypeptide | <i>P4HB</i>    | 2.564 down | .0384   | 5034    |
| Ubiquitin-specific peptidase 2                                                              | <i>USP2</i>    | 2.544 down | .00576  | 9099    |
| Zinc finger, FYVE domain containing 1                                                       | <i>ZFYVE1</i>  | 2.540 down | .0149   | 53349   |
| General transcription factor II, i                                                          | <i>GTF2I</i>   | 2.539 down | .0135   | 2969    |
| Son of sevenless homolog 2                                                                  | <i>SOS2</i>    | 2.539 down | .0211   | 6655    |
| Thrombospondin, type I, domain containing 4                                                 | <i>THSD4</i>   | 2.536 down | .0177   | 79875   |
| Jumonji domain containing 1C                                                                | <i>JMJD1C</i>  | 2.533 down | .0098   | 221037  |
| Ring finger protein 38                                                                      | <i>RNF38</i>   | 2.532 down | .00664  | 152006  |
| Muscleblind-like                                                                            | <i>MBNL1</i>   | 2.517 down | .0418   | 4154    |
| Coiled-coil domain containing 93                                                            | <i>CCDC93</i>  | 2.515 down | .0102   | 54520   |
| Cleft lip and palate associated transmembrane protein 1                                     | <i>CLPTM1</i>  | 2.505 down | .0301   | 1209    |
| HECT domain containing 1                                                                    | <i>HECTD1</i>  | 2.502 down | .0133   | 25831   |
| Transmembrane protein 168                                                                   | <i>TMEM168</i> | 2.500 down | .00924  | 64418   |
| ST6 beta-galactosamide alpha-2,6-sialyltransferase 1                                        | <i>ST6GAL1</i> | 2.495 down | .0306   | 6480    |
| Glutamate-ammonia ligase (glutamine synthetase)                                             | <i>GLUL</i>    | 2.493 down | .0239   | 2752    |
| WD repeat domain 1                                                                          | <i>WDR1</i>    | 2.490 down | .0212   | 9948    |
| UBX domain containing 7                                                                     | <i>UBXD7</i>   | 2.483 down | .0233   | 26043   |
| Dihydrolipoamide branched chain transacylase E2                                             | <i>DBT</i>     | 2.482 down | .0161   | 1629    |
| Zinc finger, BED-type containing 1                                                          | <i>ZBED1</i>   | 2.478 down | .0168   | 9189    |
| Solute carrier family 29 (nucleoside transporters), member 1                                | <i>SLC29A1</i> | 2.476 down | .0163   | 2030    |
| Mitogen-activated protein kinase 14                                                         | <i>MAPK14</i>  | 2.472 down | .0205   | 1432    |
| GRB2-associated binding protein 1                                                           | <i>GAB1</i>    | 2.465 down | .00951  | 2549    |
| Coiled-coil domain containing 22                                                            | <i>CCDC22</i>  | 2.461 down | .0137   | 28952   |
| Latent transforming growth factor beta binding protein 3                                    | <i>LTBP3</i>   | 2.459 down | .0169   | 4054    |
| Replication initiator 1                                                                     | <i>REPIN1</i>  | 2.455 down | .0256   | 29803   |
| Utrophin                                                                                    | <i>UTRN</i>    | 2.452 down | .0111   | 7402    |
| Signal recognition particle receptor ("docking protein")                                    | <i>SRPR</i>    | 2.451 down | .0181   | 6734    |
| Forkhead box J3                                                                             | <i>FOXJ3</i>   | 2.450 down | .0142   | 22887   |
| Collagen, type XII, alpha 1                                                                 | <i>COL12A1</i> | 2.446 down | .0109   | 1303    |
| TIMP metalloproteinase inhibitor 3 (Sorsby fundus dystrophy, pseudoinflammatory)            | <i>TIMP3</i>   | 2.445 down | .0338   | 7078    |
| Sperm associated antigen 9                                                                  | <i>SPAG9</i>   | 2.445 down | .0109   | 9043    |
| Zinc finger protein 395                                                                     | <i>ZNF395</i>  | 2.441 down | .0264   | 55893   |
| A kinase (PRKA) anchor protein 1                                                            | <i>AKAP1</i>   | 2.437 down | .0226   | 8165    |
| Activating transcription factor 2                                                           | <i>ATF2</i>    | 2.434 down | .0145   | 1386    |
| Collagen, type IV, alpha 2                                                                  | <i>COL4A2</i>  | 2.431 down | .0277   | 1284    |
| Myelin basic protein                                                                        | <i>MBP</i>     | 2.427 down | .00494  | 4155    |
| Golgi associated PDZ and coiled-coil motif containing                                       | <i>GOPC</i>    | 2.424 down | .00952  | 57120   |
| Microfibrillar-associated protein 3                                                         | <i>MFAP3</i>   | 2.423 down | .0171   | 4238    |
| UBX domain containing 2                                                                     | <i>UBXD2</i>   | 2.420 down | .0136   | 23190   |
| Heparan sulfate proteoglycan 2                                                              | <i>HSPG2</i>   | 2.415 down | .0109   | 3339    |
| Desmoglein 2                                                                                | <i>DSG2</i>    | 2.411 down | .0203   | 1829    |
| Exocyst complex component 4                                                                 | <i>EXOC4</i>   | 2.410 down | .019    | 60412   |
| Chloride intracellular channel 4                                                            | <i>CLIC4</i>   | 2.410 down | .0207   | 25932   |
| RAN binding protein 2                                                                       | <i>RANBP2</i>  | 2.405 down | .0116   | 5903    |
| Ring finger and CCCH-type zinc finger domains 2                                             | <i>RC3H2</i>   | 2.405 down | .0119   | 54542   |
| ATP-binding cassette, sub-family C (CFTR/MRP), member 9                                     | <i>ABCC9</i>   | 2.402 down | .0066   | 10060   |
| LSM14B, SCD6 homolog B ( <i>S cerevisiae</i> )                                              | <i>LSM14B</i>  | 2.396 down | .0118   | 149986  |
| Synaptopodin 2                                                                              | <i>SYNPO2</i>  | 2.395 down | .0246   | 171024  |
| Tripeptidyl peptidase I                                                                     | <i>TPPI</i>    | 2.391 down | .0215   | 1200    |
| Sema domain, transmembrane domain (TM), and cytoplasmic domain, (semaphorin) 6D             | <i>SEMA6D</i>  | 2.386 down | .0442   | 80031   |
| Discs, large homolog 1 ( <i>Drosophila</i> )                                                | <i>DLG1</i>    | 2.382 down | .0197   | 1739    |

TABLE E2. Continued

| Gene title                                                                      | Symbol          | Fold       | P value | Gene ID |
|---------------------------------------------------------------------------------|-----------------|------------|---------|---------|
| Obscurin-like 1                                                                 | <i>OBSL1</i>    | 2.381 down | .0441   | 23363   |
| Ubiquitination factor E4B (UFD2 homolog, yeast)                                 | <i>UBE4B</i>    | 2.377 down | .0108   | 10277   |
| LIM domain containing preferred translocation partner in lipoma                 | <i>LPP</i>      | 2.372 down | .0134   | 4026    |
| Plakophilin 4                                                                   | <i>PKP4</i>     | 2.366 down | .00687  | 8502    |
| Dual specificity phosphatase 3 (vaccinia virus phosphatase VH1-related)         | <i>DUSP3</i>    | 2.361 down | .0233   | 1845    |
| Phosphatase and actin regulator 2                                               | <i>PHACTR2</i>  | 2.361 down | .0158   | 9749    |
| DEAD (Asp-Glu-Ala-Asp) box polypeptide 3, X-linked                              | <i>DDX3X</i>    | 2.357 down | .0208   | 1654    |
| Protein tyrosine phosphatase, nonreceptor type 11 (Noonan syndrome 1)           | <i>PTPN11</i>   | 2.351 down | .0112   | 5781    |
| Chromosome 6 open reading frame 106                                             | <i>C6orf106</i> | 2.348 down | .012    | 64771   |
| Rho GTPase activating protein 5                                                 | <i>ARHGAP5</i>  | 2.348 down | .0103   | 394     |
| Runt-related transcription factor 1; translocated to, 1 (cyclin D-related)      | <i>RUNX1T1</i>  | 2.348 down | .0119   | 862     |
| Phosphoinositide-3-kinase, class 2, alpha polypeptide                           | <i>PIK3C2A</i>  | 2.347 down | .0169   | 5286    |
| Phospholipase D1, phosphatidylcholine-specific                                  | <i>PLD1</i>     | 2.347 down | .0256   | 5337    |
| Dystrophin (muscular dystrophy, Duchenne and Becker types)                      | <i>DMD</i>      | 2.344 down | .00618  | 1756    |
| Ankyrin 2, neuronal                                                             | <i>ANK2</i>     | 2.343 down | .00798  | 287     |
| Janus kinase 1 (a protein tyrosine kinase)                                      | <i>JAK1</i>     | 2.340 down | .0227   | 3716    |
| Lamin A/C                                                                       | <i>LMNA</i>     | 2.335 down | .0134   | 4000    |
| Bromodomain containing 4                                                        | <i>BRD4</i>     | 2.334 down | .039    | 23476   |
| Ubiquitin specific peptidase 42                                                 | <i>USP42</i>    | 2.321 down | .0166   | 84132   |
| Methyl CpG binding protein 2 (Rett syndrome)                                    | <i>MECP2</i>    | 2.320 down | .0479   | 4204    |
| Transglutaminase 2 (C polypeptide, protein-glutamine-gamma-glutamyltransferase) | <i>TGM2</i>     | 2.319 down | .0206   | 7052    |
| Ankylosis, progressive homolog (mouse)                                          | <i>ANKH</i>     | 2.312 down | .0205   | 56172   |
| Muskelin 1, intracellular mediator containing kelch motifs                      | <i>MKLN1</i>    | 2.311 down | .0249   | 4289    |
| Lysosomal-associated membrane protein 1                                         | <i>LAMP1</i>    | 2.311 down | .0274   | 3916    |
| CUG triplet repeat, RNA binding protein 1                                       | <i>CUGBP1</i>   | 2.309 down | .0112   | 10658   |
| Secretory carrier membrane protein 1                                            | <i>SCAMP1</i>   | 2.308 down | .0113   | 9522    |
| WD repeat domain 68                                                             | <i>WDR68</i>    | 2.307 down | .0172   | 10238   |
| Ribosomal protein S6 kinase, 90 kd, polypeptide 2                               | <i>RPS6KA2</i>  | 2.304 down | .0354   | 6196    |
| Junctional adhesion molecule 3                                                  | <i>JAM3</i>     | 2.303 down | .0158   | 83700   |
| Bromodomain containing 2                                                        | <i>BRD2</i>     | 2.294 down | .022    | 6046    |
| Phosphatidylinositol 4-kinase, catalytic, beta                                  | <i>PI4KB</i>    | 2.292 down | .0128   | 5298    |
| Jun D proto-oncogene                                                            | <i>JUND</i>     | 2.289 down | .0242   | 3727    |
| Microtubule associated serine/threonine kinase family member 4                  | <i>MAST4</i>    | 2.285 down | .0448   | 375449  |
| Utrophin                                                                        | <i>UTRN</i>     | 2.284 down | .011    | 7402    |
| Chromosome 11 open reading frame 30                                             | <i>C11orf30</i> | 2.284 down | .0433   | 56946   |
| RAB6A, member RAS oncogene family                                               | <i>RAB6A</i>    | 2.283 down | .0134   | 5870    |
| Chromosome 4 open reading frame 18                                              | <i>C4orf18</i>  | 2.283 down | .0142   | 51313   |
| Protein tyrosine phosphatase, non-receptor type 11 (Noonan syndrome 1)          | <i>PTPN11</i>   | 2.283 down | .00661  | 5781    |
| Upstream binding transcription factor, RNA polymerase I                         | <i>UBTF</i>     | 2.281 down | .0101   | 7343    |
| Collagen, type VI, alpha 1                                                      | <i>COL6A1</i>   | 2.280 down | .0169   | 1291    |
| Calcium channel, voltage-dependent, beta 2 subunit                              | <i>CACNB2</i>   | 2.280 down | .0449   | 783     |
| Corin, serine peptidase                                                         | <i>CORIN</i>    | 2.277 down | .0284   | 10699   |
| Spire homolog 1 ( <i>Drosophila</i> )                                           | <i>SPIRE1</i>   | 2.276 down | .0311   | 56907   |
| Collagen, type VI, alpha 1                                                      | <i>COL6A1</i>   | 2.273 down | .00933  | 1291    |
| Angiopoietin-like 2                                                             | <i>ANGPTL2</i>  | 2.272 down | .0125   | 23452   |
| Sortilin 1                                                                      | <i>SORT1</i>    | 2.271 down | .0214   | 6272    |
| Vacuolar protein sorting 35 homolog ( <i>S cerevisiae</i> )                     | <i>VPS35</i>    | 2.269 down | .0219   | 55737   |
| ADAM metallopeptidase domain 9 (meltrin gamma)                                  | <i>ADAM9</i>    | 2.269 down | .016    | 8754    |
| Palladin, cytoskeletal associated protein                                       | <i>PALLD</i>    | 2.266 down | .0127   | 23022   |



TABLE E2. Continued

| Gene title                                                                                                     | Symbol                       | Fold       | P value | Gene ID      |
|----------------------------------------------------------------------------------------------------------------|------------------------------|------------|---------|--------------|
| Tumor necrosis factor receptor superfamily, member 19                                                          | <i>TNFRSF19</i>              | 2.258 down | .0218   | 55504        |
| Zinc finger protein, X-linked//zinc finger protein, Y-linked                                                   | <i>ZFX//ZFY</i>              | 2.256 down | .0216   | 7543//7544   |
| Oxoglutarate (alpha-ketoglutarate) dehydrogenase (lipoamide)                                                   | <i>OGDH</i>                  | 2.251 down | .0124   | 4967         |
| CDV3 homolog (mouse)                                                                                           | <i>CDV3</i>                  | 2.251 down | .0111   | 55573        |
| Meningioma expressed antigen 5 (hyaluronidase)                                                                 | <i>MGEA5</i>                 | 2.245 down | .0113   | 10724        |
| Solute carrier family 7 (cationic amino acid transporter, y+ system), member 6                                 | <i>SLC7A6</i>                | 2.245 down | .0455   | 9057         |
| Component of oligomeric Golgi complex 3                                                                        | <i>COG3</i>                  | 2.241 down | .0125   | 83548        |
| Protein tyrosine phosphatase, non-receptor type 21                                                             | <i>PTPN21</i>                | 2.239 down | .0199   | 11099        |
| Obscurin-like 1                                                                                                | <i>OBSL1</i>                 | 2.238 down | .0324   | 23363        |
| Phosphorylase kinase, gamma 1 (muscle)                                                                         | <i>PHKG1</i>                 | 2.236 down | .0239   | 5260         |
| LanC lantibiotic synthetase component C-like 1 (bacterial)                                                     | <i>LANCLI</i>                | 2.234 down | .0183   | 10314        |
| Obscurin-like 1                                                                                                | <i>OBSL1</i>                 | 2.229 down | .0282   | 23363        |
| Ubiquitin specific peptidase 47                                                                                | <i>USP47</i>                 | 2.227 down | .00285  | 55031        |
| Structural maintenance of chromosomes 3                                                                        | <i>SMC3</i>                  | 2.226 down | .0134   | 9126         |
| Ankyrin repeat and KH domain containing 1                                                                      | <i>ANKHD1</i>                | 2.225 down | .0259   | 404734       |
| Kelch repeat and BTB (POZ) domain containing 2                                                                 | <i>KBTBD2</i>                | 2.225 down | .0116   | 25948        |
| Arginine-glutamic acid dipeptide (RE) repeats                                                                  | <i>RERE</i>                  | 2.224 down | .0448   | 473          |
| Nuclear factor of activated T-cells, cytoplasmic, calcineurin-dependent 2 interacting protein                  | <i>NFATC2IP</i>              | 2.223 down | .0151   | 84901        |
| Spire homolog 1 ( <i>Drosophila</i> )                                                                          | <i>SPIRE1</i>                | 2.217 down | .0146   | 56907        |
| Protein phosphatase 1, regulatory (inhibitor) subunit 3B                                                       | <i>PPP1R3B</i>               | 2.217 down | .0234   | 79660        |
| Versican                                                                                                       | <i>VCAN</i>                  | 2.212 down | .0487   | 1462         |
| Mitogen-activated protein kinase 14                                                                            | <i>MAPK14</i>                | 2.210 down | .0377   | 1432         |
| ARP2 actin-related protein 2 homolog (yeast)                                                                   | <i>ACTR2</i>                 | 2.205 down | .0088   | 10097        |
| Sorbin and SH3 domain containing 1                                                                             | <i>SORBS1</i>                | 2.205 down | .0112   | 10580        |
| Son of sevenless homolog 2 ( <i>Drosophila</i> )                                                               | <i>SOS2</i>                  | 2.204 down | .0404   | 6655         |
| Mitogen-activated protein kinase 14                                                                            | <i>MAPK14</i>                | 2.201 down | .0111   | 1432         |
| Glucosaminyl (N-acetyl) transferase 2, I-branching enzyme (I blood group)                                      | <i>GCNT2</i>                 | 2.194 down | .0255   | 2651         |
| MRNA; cDNA DKFZp451B209 (from clone DKFZp451B209)                                                              |                              | 2.193 down | .028    |              |
| ARP2 actin-related protein 2 homolog (yeast)                                                                   | <i>ACTR2</i>                 | 2.193 down | .0167   | 10097        |
| Syntaxin 16                                                                                                    | <i>STX16</i>                 | 2.192 down | .0145   | 8675         |
| Non-POU domain containing, octamer-binding                                                                     | <i>NONO</i>                  | 2.190 down | .0255   | 4841         |
| Jumonji, AT rich interactive domain 1B                                                                         | <i>JARID1B</i>               | 2.189 down | .0274   | 10765        |
| Replication protein A1, 70 kd                                                                                  | <i>RPA1</i>                  | 2.185 down | .0103   | 6117         |
| Sorting nexin 13                                                                                               | <i>SNX13</i>                 | 2.183 down | .0124   | 23161        |
| Neural cell adhesion molecule 1                                                                                | <i>NCAM1</i>                 | 2.177 down | .0119   | 4684         |
| Ubiquitin protein ligase E3B                                                                                   | <i>UBE3B</i>                 | 2.177 down | .012    | 89910        |
| Endoplasmic reticulum aminopeptidase 2                                                                         | <i>ERAP2</i>                 | 2.172 down | .0346   | 64167        |
| Mitogen-activated protein kinase kinase kinase kinase 5                                                        | <i>MAP4K5</i>                | 2.171 down | .0111   | 11183        |
| Chromosome 6 open reading frame 166                                                                            | <i>C6orf166</i>              | 2.168 down | .0171   | 55122        |
| Prickle homolog 1 ( <i>Drosophila</i> )                                                                        | <i>PRICKLE1</i>              | 2.168 down | .0424   | 144165       |
| Erythrocyte membrane protein band 4.1-like 2                                                                   | <i>EPB41L2</i>               | 2.168 down | .0116   | 2037         |
| Platelet-activating factor acetylhydrolase, isoform Ib, alpha subunit 45 kd                                    | <i>PAFAH1B1</i>              | 2.165 down | .0262   | 5048         |
| Chromosome 1 open reading frame 55                                                                             | <i>C1orf55</i>               | 2.164 down | .0169   | 163859       |
| v-erb-b2 erythroblastic leukemia viral oncogene homolog 2, neuro/glioblastoma derived oncogene homolog (avian) | <i>ERBB2</i>                 | 2.163 down | .0132   | 2064         |
| DnaJ (Hsp40) homolog, subfamily C, member 14                                                                   | <i>DNAJC14</i>               | 2.163 down | .0253   | 85406        |
| Family with sequence similarity 115, member A//family with sequence similarity 115, member B                   | <i>FAM115A//<br/>FAM115B</i> | 2.162 down | .011    | 653199//9747 |
| Trans-Golgi network protein 2                                                                                  | <i>TGOLN2</i>                | 2.160 down | .0212   | 10618        |
| Presenilin 1 (Alzheimer disease 3)                                                                             | <i>PSEN1</i>                 | 2.160 down | .0142   | 5663         |

TABLE E2. Continued

| Gene title                                                                                                               | Symbol          | Fold       | P value | Gene ID |
|--------------------------------------------------------------------------------------------------------------------------|-----------------|------------|---------|---------|
| Cbp/p300-interacting transactivator, with Glu/Asp-rich carboxy-terminal domain, 2                                        | <i>CITED2</i>   | 2.160 down | .0323   | 10370   |
| Ubiquitin-like modifier activating enzyme 1                                                                              | <i>UBA1</i>     | 2.159 down | .0234   | 7317    |
| Phosphatidylinositol-4-phosphate 5-kinase, type I, alpha                                                                 | <i>PIP5K1A</i>  | 2.157 down | .0366   | 8394    |
| B-cell chronic lymphocytic leukemia/lymphoma 6 (zinc finger protein 51)                                                  | <i>BCL6</i>     | 2.156 down | .0463   | 604     |
| Zinc finger protein 317                                                                                                  | <i>ZNF317</i>   | 2.155 down | .0206   | 57693   |
| Sorting nexin 13                                                                                                         | <i>SNX13</i>    | 2.153 down | .0236   | 23161   |
| SUMO1/sentrin/SMT3 specific peptidase 3                                                                                  | <i>SEN3</i>     | 2.150 down | .0127   | 26168   |
| Structural maintenance of chromosomes 3                                                                                  | <i>SMC3</i>     | 2.149 down | .0115   | 9126    |
| Methionine adenosyltransferase II, alpha                                                                                 | <i>MAT2A</i>    | 2.148 down | .0187   | 4144    |
| Polymerase (DNA-directed), delta interacting protein 3                                                                   | <i>POLDIP3</i>  | 2.145 down | .0133   | 84271   |
| Receptor interacting protein kinase 5                                                                                    | <i>RIPK5</i>    | 2.139 down | .012    | 25778   |
| Retinoic acid receptor, beta                                                                                             | <i>RARB</i>     | 2.137 down | .0307   | 5915    |
| O-linked N-acetylglucosamine (GlcNAc) transferase (UDP-N-acetylglucosamine:polypeptide-N-acetylglucosaminyl transferase) | <i>OGT</i>      | 2.136 down | .0154   | 8473    |
| PTPRF interacting protein, binding protein 1 (liprin beta 1)                                                             | <i>PPFIBP1</i>  | 2.136 down | .012    | 8496    |
| Trinucleotide repeat containing 6C                                                                                       | <i>TNRC6C</i>   | 2.136 down | .0124   | 57690   |
| FRY-like                                                                                                                 | <i>FRYL</i>     | 2.134 down | .0128   | 285527  |
| Ankyrin repeat and FYVE domain containing 1                                                                              | <i>ANKFY1</i>   | 2.134 down | .0125   | 51479   |
| DIP2 disco-interacting protein 2 homolog C ( <i>Drosophila</i> )                                                         | <i>DIP2C</i>    | 2.134 down | .0113   | 22982   |
| ARP2 actin-related protein 2 homolog (yeast)                                                                             | <i>ACTR2</i>    | 2.133 down | .015    | 10097   |
| Deleted in liver cancer 1                                                                                                | <i>DLC1</i>     | 2.132 down | .0206   | 10395   |
| ets variant gene 1                                                                                                       | <i>ETV1</i>     | 2.131 down | .0239   | 2115    |
| Translocated promoter region (to activated MET oncogene)                                                                 | <i>TPR</i>      | 2.131 down | .0243   | 7175    |
| Signal transducer and activator of transcription 3 (acute-phase response factor)                                         | <i>STAT3</i>    | 2.130 down | .0187   | 6774    |
| Calcium binding protein 39                                                                                               | <i>CAB39</i>    | 2.129 down | .0217   | 51719   |
| Glutamine and serine rich 1                                                                                              | <i>QSER1</i>    | 2.129 down | .0119   | 79832   |
| Actin binding LIM protein 1                                                                                              | <i>ABLIM1</i>   | 2.127 down | .017    | 3983    |
| Zinc finger protein 36, C3H type-like 2                                                                                  | <i>ZFP36L2</i>  | 2.125 down | .0394   | 678     |
| Junctional adhesion molecule 3                                                                                           | <i>JAM3</i>     | 2.122 down | .00921  | 83700   |
| Golgi autoantigen, golgin subfamily a, 2                                                                                 | <i>GOLGA2</i>   | 2.121 down | .0272   | 2801    |
| Nuclear factor I/A                                                                                                       | <i>NFIA</i>     | 2.121 down | .0102   | 4774    |
| Cholinergic receptor, muscarinic 2                                                                                       | <i>CHRM2</i>    | 2.120 down | .0355   | 1129    |
| Ankyrin 3, node of Ranvier (ankyrin G)                                                                                   | <i>ANK3</i>     | 2.120 down | .0365   | 288     |
| Neuroblastoma breakpoint family, member 1                                                                                | <i>NBPF1</i>    | 2.117 down | .0114   | 149013  |
| FRY-like                                                                                                                 | <i>FRYL</i>     | 2.115 down | .0254   | 285527  |
| UDP-N-acetyl-alpha-D-galactosamine:polypeptide N-acetylglucosaminyltransferase 2 (GalNAc-T2)                             | <i>GALNT2</i>   | 2.113 down | .0158   | 2590    |
| MAP/microtubule affinity-regulating kinase 2                                                                             | <i>MARK2</i>    | 2.113 down | .0376   | 2011    |
| Transmembrane 9 superfamily protein member 4                                                                             | <i>TM9SF4</i>   | 2.113 down | .0212   | 9777    |
| Nucleobindin 1                                                                                                           | <i>NUCB1</i>    | 2.109 down | .0258   | 4924    |
| Rho GTPase activating protein 26                                                                                         | <i>ARHGAP26</i> | 2.109 down | .0228   | 23092   |
| Dynactin 1 (p150, glued homolog, <i>Drosophila</i> )                                                                     | <i>DCTN1</i>    | 2.109 down | .0157   | 1639    |
| Ubiquitin specific peptidase 10                                                                                          | <i>USP10</i>    | 2.106 down | .0209   | 9100    |
| Squamous cell carcinoma antigen recognized by T cells 3                                                                  | <i>SART3</i>    | 2.105 down | .0113   | 9733    |
| Importin 8                                                                                                               | <i>IPO8</i>     | 2.104 down | .0137   | 10526   |
| Hepatocyte growth factor-regulated tyrosine kinase substrate                                                             | <i>HGS</i>      | 2.103 down | .0206   | 9146    |
| Solute carrier family 8 (sodium/calcium exchanger), member 1                                                             | <i>SLC8A1</i>   | 2.102 down | .0122   | 6546    |
| Protein tyrosine phosphatase, non-receptor type 12                                                                       | <i>PTPN12</i>   | 2.102 down | .041    | 5782    |
| Chloride intracellular channel 4                                                                                         | <i>CLIC4</i>    | 2.100 down | .026    | 25932   |
| FK506 binding protein 15, 133 kd                                                                                         | <i>FKBP15</i>   | 2.099 down | .0249   | 23307   |
| Insulin-like growth factor binding protein 5                                                                             | <i>IGFBP5</i>   | 2.097 down | .0263   | 3488    |

TABLE E2. Continued

| Gene title                                                                                                               | Symbol                  | Fold       | P value | Gene ID       |
|--------------------------------------------------------------------------------------------------------------------------|-------------------------|------------|---------|---------------|
| ATPase, H <sup>+</sup> transporting, lysosomal 70 kd, V1 subunit A                                                       | <i>ATP6V1A</i>          | 2.097 down | .0143   | 523           |
| Neighbor of BRCA1 gene 1///similar to neighbor of BRCA1 gene 1                                                           | <i>LOC727732///NBR1</i> | 2.096 down | .0126   | 4077///727732 |
| TEA domain family member 2                                                                                               | <i>TEAD2</i>            | 2.096 down | .0399   | 8463          |
| Cytokine-like nuclear factor n-pac                                                                                       | <i>N-PAC</i>            | 2.095 down | .0225   | 84656         |
| CCR4-NOT transcription complex, subunit 1                                                                                | <i>CNOT1</i>            | 2.093 down | .0122   | 23019         |
| Myosin XVIIIIB                                                                                                           | <i>MYO18B</i>           | 2.090 down | .0218   | 84700         |
| Leucine-rich repeats and immunoglobulin-like domains 1                                                                   | <i>LRIG1</i>            | 2.090 down | .0134   | 26018         |
| Zinc finger protein 514                                                                                                  | <i>ZNF514</i>           | 2.090 down | .0335   | 84874         |
| Apolipoprotein E                                                                                                         | <i>APOE</i>             | 2.088 down | .0284   | 348           |
| Minichromosome maintenance complex component 7                                                                           | <i>MCM7</i>             | 2.086 down | .0258   | 4176          |
| Arsenate resistance protein 2                                                                                            | <i>ARS2</i>             | 2.082 down | .0209   | 51593         |
| N-acetyltransferase 11                                                                                                   | <i>NAT11</i>            | 2.081 down | .0317   | 79829         |
| GM2 ganglioside activator                                                                                                | <i>GM2A</i>             | 2.079 down | .0372   | 2760          |
| Jun D proto-oncogene                                                                                                     | <i>JUND</i>             | 2.079 down | .0218   | 3727          |
| Mitogen-activated protein kinase kinase kinase 2                                                                         | <i>MAP3K2</i>           | 2.077 down | .00667  | 10746         |
| Karyopherin alpha 1 (importin alpha 5)                                                                                   | <i>KPNA1</i>            | 2.076 down | .0169   | 3836          |
| YY1 transcription factor                                                                                                 | <i>YY1</i>              | 2.075 down | .048    | 7528          |
| KDEL (Lys-Asp-Glu-Leu) endoplasmic reticulum protein retention receptor 1                                                | <i>KDELRL1</i>          | 2.074 down | .0175   | 10945         |
| Prolyl endopeptidase-like                                                                                                | <i>PREPL</i>            | 2.072 down | .0113   | 9581          |
| O-linked N-acetylglucosamine (GlcNAc) transferase (UDP-N-acetylglucosamine:polypeptide-N-acetylglucosaminyl transferase) | <i>OGT</i>              | 2.072 down | .0136   | 8473          |
| Insulin-like growth factor 2 receptor                                                                                    | <i>IGF2R</i>            | 2.072 down | .0102   | 3482          |
| Zinc finger protein 275                                                                                                  | <i>ZNF275</i>           | 2.070 down | .0462   | 10838         |
| Zinc finger, MYM-type 2                                                                                                  | <i>ZMYM2</i>            | 2.069 down | .0255   | 7750          |
| GTPase activating protein (SH3 domain) binding protein 2                                                                 | <i>G3BP2</i>            | 2.069 down | .0134   | 9908          |
| CDNA FLJ33081 fis, clone TRACH2000321                                                                                    |                         | 2.069 down | .0287   |               |
| KIAA0430                                                                                                                 | <i>KIAA0430</i>         | 2.068 down | .0136   | 9665          |
| ets variant gene 1                                                                                                       | <i>ETV1</i>             | 2.068 down | .0125   | 2115          |
| Leucine rich repeat (in FLII) interacting protein 2                                                                      | <i>LRRFIP2</i>          | 2.067 down | .0162   | 9209          |
| Endothelial differentiation, lysophosphatidic acid G-protein-coupled receptor, 7                                         | <i>EDG7</i>             | 2.066 down | .0437   | 23566         |
| Obscurin-like 1                                                                                                          | <i>OBSL1</i>            | 2.066 down | .0243   | 23363         |
| Retinoblastoma-like 2 (p130)                                                                                             | <i>RBL2</i>             | 2.065 down | .0175   | 5934          |
| Ubiquitin-conjugating enzyme E2G 2 (UBC7 homolog, yeast)                                                                 | <i>UBE2G2</i>           | 2.065 down | .0125   | 7327          |
| Calcium channel, voltage-dependent, alpha 2/delta subunit 1                                                              | <i>CACNA2D1</i>         | 2.062 down | .0237   | 781           |
| Uridine-cytidine kinase 1-like 1                                                                                         | <i>UCKL1</i>            | 2.062 down | .0344   | 54963         |
| Bromodomain containing 2                                                                                                 | <i>BRD2</i>             | 2.059 down | .0473   | 6046          |
| Tripartite motif-containing 56                                                                                           | <i>TRIM56</i>           | 2.059 down | .0129   | 81844         |
| AF4/FMR2 family, member 4                                                                                                | <i>AFF4</i>             | 2.059 down | .0442   | 27125         |
| Ubiquitously transcribed tetratricopeptide repeat, X chromosome                                                          | <i>UTX</i>              | 2.058 down | .0299   | 7403          |
| Spectrin, beta, nonerythrocytic 1                                                                                        | <i>SPTBN1</i>           | 2.057 down | .017    | 6711          |
| Striatin, calmodulin binding protein                                                                                     | <i>STRN</i>             | 2.057 down | .0113   | 6801          |
| Uridine-cytidine kinase 1                                                                                                | <i>UCK1</i>             | 2.056 down | .0281   | 83549         |
| Solute carrier family 2 (facilitated glucose transporter), member 11                                                     | <i>SLC2A11</i>          | 2.055 down | .0197   | 66035         |
| Hypothetical LOC552889                                                                                                   | <i>LOC552889</i>        | 2.053 down | .0136   | 552889        |
| Peroxisome proliferator-activated receptor alpha                                                                         | <i>PPARA</i>            | 2.051 down | .0151   | 5465          |
| Chromosome 10 open reading frame 46                                                                                      | <i>C10orf46</i>         | 2.051 down | .0163   | 143384        |

TABLE E2. Continued

| Gene title                                                                                                                     | Symbol                      | Fold       | P value | Gene ID            |
|--------------------------------------------------------------------------------------------------------------------------------|-----------------------------|------------|---------|--------------------|
| Outer dense fiber of sperm tails 2                                                                                             | <i>ODF2</i>                 | 2.049 down | .0114   | 4957               |
| O-linked N-acetylglucosamine (GlcNAc) transferase<br>(UDP-N-acetylglucosamine:polypeptide-N-acetylglucosaminyl<br>transferase) | <i>OGT</i>                  | 2.048 down | .016    | 8473               |
| Janus kinase 1 (a protein tyrosine kinase)                                                                                     | <i>JAK1</i>                 | 2.047 down | .0312   | 3716               |
| Structure specific recognition protein 1                                                                                       | <i>SSRP1</i>                | 2.047 down | .0211   | 6749               |
| Glutamyl-prolyl-tRNA synthetase                                                                                                | <i>EPRS</i>                 | 2.047 down | .0149   | 2058               |
| Karyopherin alpha 4 (importin alpha 3)                                                                                         | <i>KPNA4</i>                | 2.045 down | .0126   | 3840               |
| MAD1 mitotic arrest deficient-like 1 (yeast)                                                                                   | <i>MAD1L1</i>               | 2.045 down | .0331   | 8379               |
| Zinc finger CCCH-type containing 11A                                                                                           | <i>ZC3H11A</i>              | 2.045 down | .0113   | 9877               |
| Ubiquitin specific peptidase 25                                                                                                | <i>USP25</i>                | 2.044 down | .0103   | 29761              |
| Tribbles homolog 2 ( <i>Drosophila</i> )                                                                                       | <i>TRIB2</i>                | 2.044 down | .00966  | 28951              |
| Adenomatous polyposis coli                                                                                                     | <i>APC</i>                  | 2.043 down | .0111   | 324                |
| Centrosomal protein 68 kd                                                                                                      | <i>CEP68</i>                | 2.040 down | .0174   | 23177              |
| Protein phosphatase 1, regulatory (inhibitor) subunit 12B                                                                      | <i>PPP1R12B</i>             | 2.040 down | .012    | 4660               |
| v-crk sarcoma virus CT10 oncogene homolog (avian)                                                                              | <i>CRK</i>                  | 2.037 down | .022    | 1398               |
| Protein phosphatase 2, regulatory subunit B', delta isoform                                                                    | <i>PPP2R5D</i>              | 2.034 down | .0319   | 5528               |
| GATA zinc finger domain containing 1                                                                                           | <i>GATAD1</i>               | 2.033 down | .0295   | 57798              |
| Dipeptidyl-peptidase 8                                                                                                         | <i>DPP8</i>                 | 2.031 down | .0442   | 54878              |
| Mitochondrial tumor suppressor 1                                                                                               | <i>MTUS1</i>                | 2.030 down | .0258   | 57509              |
| Ubiquitination factor E4B (UFD2 homolog, yeast)                                                                                | <i>UBE4B</i>                | 2.028 down | .0118   | 10277              |
| Fusion (involved in t(12;16) in malignant liposarcoma)                                                                         | <i>FUS</i>                  | 2.027 down | .0394   | 2521               |
| Hippocalcin-like 1                                                                                                             | <i>HPCAL1</i>               | 2.027 down | .0449   | 3241               |
| ATP-binding cassette, sub-family C (CFTR/MRP), member 9                                                                        | <i>ABCC9</i>                | 2.027 down | .0125   | 10060              |
| Protein tyrosine phosphatase, non-receptor type 21                                                                             | <i>PTPN21</i>               | 2.025 down | .0234   | 11099              |
| Ubiquitin specific peptidase 34                                                                                                | <i>USP34</i>                | 2.024 down | .0159   | 9736               |
| DEAD (Asp-Glu-Ala-Asp) box polypeptide 3, X-linked                                                                             | <i>DDX3X</i>                | 2.024 down | .0203   | 1654               |
| Phosphatidylinositol binding clathrin assembly protein                                                                         | <i>PICALM</i>               | 2.023 down | .0158   | 8301               |
| Transportin 3                                                                                                                  | <i>TNPO3</i>                | 2.022 down | .0166   | 23534              |
| Non-POU domain containing, octamer-binding                                                                                     | <i>NONO</i>                 | 2.022 down | .0192   | 4841               |
| ORM1-like 3 ( <i>S cerevisiae</i> )                                                                                            | <i>ORMDL3</i>               | 2.021 down | .014    | 94103              |
| Mitogen-activated protein kinase kinase kinase kinase 4                                                                        | <i>MAP4K4</i>               | 2.021 down | .0371   | 9448               |
| Tribbles homolog 1 ( <i>Drosophila</i> )                                                                                       | <i>TRIB1</i>                | 2.021 down | .0206   | 10221              |
| WD repeat domain 6                                                                                                             | <i>WDR6</i>                 | 2.020 down | .0135   | 11180              |
| Aspartate beta-hydroxylase                                                                                                     | <i>ASPH</i>                 | 2.020 down | .00586  | 444                |
| Zinc finger protein 45                                                                                                         | <i>ZNF45</i>                | 2.019 down | .0125   | 7596               |
| SET domain containing 5                                                                                                        | <i>SETD5</i>                | 2.019 down | .0266   | 55209              |
| Eukaryotic translation initiation factor 4E nuclear import factor 1                                                            | <i>EIF4ENIF1</i>            | 2.017 down | .0142   | 56478              |
| High-density lipoprotein binding protein (vigilin)                                                                             | <i>HDLBP</i>                | 2.013 down | .0162   | 3069               |
| Mannosyl (alpha-1,3-)-glycoprotein beta-1,<br>4-N-acetylglucosaminyltransferase, isozyme B                                     | <i>MGAT4B</i>               | 2.012 down | .0175   | 11282              |
| AT rich interactive domain 1A (SWI-like)                                                                                       | <i>ARID1A</i>               | 2.012 down | .0426   | 8289               |
| Alkylglycerone phosphate synthase                                                                                              | <i>AGPS</i>                 | 2.011 down | .00981  | 8540               |
| MLCK protein                                                                                                                   | <i>MLCK</i>                 | 2.010 down | .0158   | 91807              |
| FYVE, RhoGEF and PH domain containing 6                                                                                        | <i>FGD6</i>                 | 2.009 down | .0163   | 55785              |
| Cytoplasmic FMR1 interacting protein 2                                                                                         | <i>CYFIP2</i>               | 2.007 down | .0392   | 26999              |
| Acyl-CoA thioesterase 11                                                                                                       | <i>ACOT11</i>               | 2.003 down | .0417   | 26027              |
| Ubiquitin specific peptidase 11                                                                                                | <i>USP11</i>                | 2.001 down | .0306   | 8237               |
| Zinc finger protein 395//F-box protein 16                                                                                      | <i>FBXO16///<br/>ZNF395</i> | 2.000 down | .035    | 157574///<br>55893 |
| Adrenergic, alpha-1A-, receptor                                                                                                | <i>ADRA1A</i>               | 1.998 down | .0404   | 148                |
| M-phase phosphoprotein 9                                                                                                       | <i>MPHOSPH9</i>             | 1.996 down | .0239   | 10198              |
| Nudix (nucleoside diphosphate linked moiety X)-type motif 21                                                                   | <i>NUDT21</i>               | 1.995 down | .0167   | 11051              |
| Kruppel-like factor 3 (basic)                                                                                                  | <i>KLF3</i>                 | 1.993 down | .0169   | 51274              |
| Synovial sarcoma translocation, chromosome 18                                                                                  | <i>SS18</i>                 | 1.992 down | .0185   | 6760               |

TABLE E2. Continued

| Gene title                                                                                           | Symbol                                    | Fold       | P value | Gene ID            |
|------------------------------------------------------------------------------------------------------|-------------------------------------------|------------|---------|--------------------|
| Exocyst complex component 5                                                                          | <i>EXOC5</i>                              | 1.991 down | .016    | 10640              |
| Rabaptin, RAB GTPase binding effector protein 1                                                      | <i>RABEP1</i>                             | 1.990 down | .0482   | 9135               |
| PRP4 pre-mRNA processing factor 4 homolog (yeast)                                                    | <i>PRPF4</i>                              | 1.990 down | .0206   | 9128               |
| CDNA FLJ10151 fis, clone HEMBA1003402                                                                |                                           | 1.986 down | .0136   |                    |
| CDNA clone IMAGE:5263531                                                                             |                                           | 1.986 down | .0114   |                    |
| SH3-domain GRB2-like endophilin B2                                                                   | <i>SH3GLB2</i>                            | 1.985 down | .0301   | 56904              |
| Serologically defined colon cancer antigen 1                                                         | <i>SDCCAG1</i>                            | 1.985 down | .0111   | 9147               |
| Zinc finger protein 398                                                                              | <i>ZNF398</i>                             | 1.981 down | .0365   | 57541              |
| Cytochrome b reductase 1                                                                             | <i>CYBRD1</i>                             | 1.980 down | .0237   | 79901              |
| Transformation/transcription domain-associated protein                                               | <i>TRRAP</i>                              | 1.977 down | .0235   | 8295               |
| SON DNA binding protein                                                                              | <i>SON</i>                                | 1.975 down | .0125   | 6651               |
| Nucleoporin 133 kd                                                                                   | <i>NUP133</i>                             | 1.975 down | .0187   | 55746              |
| Discoidin domain receptor family, member 2                                                           | <i>DDR2</i>                               | 1.973 down | .0112   | 4921               |
| A kinase (PRKA) anchor protein 8-like                                                                | <i>AKAP8L</i>                             | 1.971 down | .0291   | 26993              |
| Lanosterol synthase (2,3-oxidosqualene-lanosterol cyclase)                                           | <i>LSS</i>                                | 1.971 down | .0347   | 4047               |
| dpy-19-like 1 ( <i>C elegans</i> )                                                                   | <i>DPY19L1</i>                            | 1.968 down | .0174   | 23333              |
| Dystonin                                                                                             | <i>DST</i>                                | 1.967 down | .00579  | 667                |
| Splicing factor, arginine/serine-rich 8<br>(suppressor-of-white-apricot homolog, <i>Drosophila</i> ) | <i>SFRS8</i>                              | 1.967 down | .0239   | 6433               |
| NGFI-A binding protein 1 (EGR1 binding protein 1)                                                    | <i>NAB1</i>                               | 1.965 down | .0132   | 4664               |
| Exocyst complex component 7                                                                          | <i>EXOC7</i>                              | 1.963 down | .0278   | 23265              |
| Syntrophin, beta 2 (dystrophin-associated protein A1, 59 kd,<br>basic component 2)                   | <i>SNTB2</i>                              | 1.962 down | .0196   | 6645               |
| SEC63 homolog ( <i>S cerevisiae</i> )                                                                | <i>SEC63</i>                              | 1.961 down | .0142   | 11231              |
| SHC (Src homology 2 domain containing) transforming<br>protein 1                                     | <i>SHC1</i>                               | 1.960 down | .0129   | 6464               |
| Engulfment and cell motility 2                                                                       | <i>ELMO2</i>                              | 1.960 down | .021    | 63916              |
| Chromosome 1 open reading frame 25                                                                   | <i>C1orf25</i>                            | 1.959 down | .0309   | 81627              |
| Glutamate-ammonia ligase (glutamine synthetase)                                                      | <i>GLUL</i>                               | 1.958 down | .0355   | 2752               |
| MYST histone acetyltransferase (monocytic leukemia) 4                                                | <i>MYST4</i>                              | 1.957 down | .0229   | 23522              |
| FOS-like antigen 2                                                                                   | <i>FOSL2</i>                              | 1.957 down | .0326   | 2355               |
| KIAA0692                                                                                             | <i>KIAA0692</i>                           | 1.957 down | .025    | 23141              |
| Potassium channel tetramerization domain containing 20                                               | <i>KCTD20</i>                             | 1.955 down | .028    | 222658             |
| WD repeat domain 26                                                                                  | <i>WDR26</i>                              | 1.955 down | .0125   | 80232              |
| Senataxin                                                                                            | <i>SETX</i>                               | 1.953 down | .0121   | 23064              |
| Trinucleotide repeat containing 6B                                                                   | <i>TNRC6B</i>                             | 1.951 down | .00655  | 23112              |
| Transmembrane 9 superfamily member 1                                                                 | <i>TM9SF1</i>                             | 1.951 down | .0301   | 10548              |
| Family with sequence similarity 108, member B1                                                       | <i>FAM108B1</i>                           | 1.948 down | .0404   | 51104              |
| Transmembrane protein 30A                                                                            | <i>TMEM30A</i>                            | 1.948 down | .0137   | 55754              |
| CTD (carboxy-terminal domain, RNA polymerase II,<br>polypeptide A) small phosphatase like 2          | <i>CTDSPL2</i>                            | 1.948 down | .0238   | 51496              |
| Zinc finger protein 24                                                                               | <i>ZNF24</i>                              | 1.947 down | .011    | 7572               |
| HLA-B associated transcript 3                                                                        | <i>BAT3</i>                               | 1.947 down | .0299   | 7917               |
| Chromosome 21 open reading frame 33                                                                  | <i>C21orf33</i>                           | 1.946 down | .0321   | 8209               |
| Protein kinase C substrate 80K-H                                                                     | <i>PRKCSH</i>                             | 1.945 down | .0205   | 5589               |
| Pleckstrin homology, Sec7 and coiled-coil domains 3                                                  | <i>PSCD3</i>                              | 1.943 down | .0134   | 9265               |
| BCL2-antagonist of cell death                                                                        | <i>BAD</i>                                | 1.941 down | .0326   | 572                |
| A kinase (PRKA) anchor protein 10                                                                    | <i>AKAP10</i>                             | 1.941 down | .0355   | 11216              |
| Sorbin and SH3 domain containing 3                                                                   | <i>SORBS3</i>                             | 1.939 down | .0162   | 10174              |
| v-akt murine thymoma viral oncogene homolog 2                                                        | <i>AKT2</i>                               | 1.939 down | .035    | 208                |
| Myeloid/lymphoid or mixed-lineage leukemia<br>(trithorax homolog, <i>Drosophila</i> )                | <i>MLL</i>                                | 1.939 down | .0264   | 4297               |
| Integrin, alpha 7                                                                                    | <i>ITGA7</i>                              | 1.938 down | .0256   | 3679               |
| Ankyrin repeat and KH domain containing<br>1///ANKHD1-EIF4EBP3                                       | <i>ANKHD1///<br/>ANKHD1-<br/>EIF4EBP3</i> | 1.938 down | .0401   | 404734///<br>54882 |

TABLE E2. Continued

| Gene title                                                                                                                                   | Symbol          | Fold       | P value | Gene ID |
|----------------------------------------------------------------------------------------------------------------------------------------------|-----------------|------------|---------|---------|
| CCR4-NOT transcription complex, subunit 4                                                                                                    | <i>CNOT4</i>    | 1.937 down | .0261   | 4850    |
| CDNA FLJ38461 fis, clone FEBRA2020977                                                                                                        |                 | 1.935 down | .0168   |         |
| Membrane-associated ring finger (C3HC4) 6                                                                                                    | <i>7-Mar</i>    | 1.935 down | .00973  | 10299   |
| Zinc finger protein 540                                                                                                                      | <i>ZNF540</i>   | 1.934 down | .024    | 163255  |
| Solute carrier family 30 (zinc transporter), member 5                                                                                        | <i>SLC30A5</i>  | 1.934 down | .00814  | 64924   |
| Ral guanine nucleotide dissociation stimulator                                                                                               | <i>RALGDS</i>   | 1.934 down | .0212   | 5900    |
| Mitogen-activated protein kinase 1                                                                                                           | <i>MAPK1</i>    | 1.933 down | .0124   | 5594    |
| Small G protein signaling modulator 3                                                                                                        | <i>SGSM3</i>    | 1.932 down | .0354   | 27352   |
| Intracisternal A particle-promoted polypeptide                                                                                               | <i>IPP</i>      | 1.932 down | .0337   | 3652    |
| Mediator complex subunit 23                                                                                                                  | <i>MED23</i>    | 1.931 down | .0242   | 9439    |
| Bone morphogenetic protein receptor, type II<br>(serine/threonine kinase)                                                                    | <i>BMPR2</i>    | 1.929 down | .0111   | 659     |
| MOCO sulphurase C-terminal domain containing 2                                                                                               | <i>MOSC2</i>    | 1.928 down | .00932  | 54996   |
| Myeloid/lymphoid or mixed-lineage leukemia<br>(trithorax homolog, <i>Drosophila</i> )                                                        | <i>MLL</i>      | 1.927 down | .0172   | 4297    |
| Troponin T type 2 (cardiac)                                                                                                                  | <i>TNNT2</i>    | 1.926 down | .0352   | 7139    |
| ATPase, H <sup>+</sup> transporting, lysosomal V0 subunit a1                                                                                 | <i>ATP6V0A1</i> | 1.925 down | .0372   | 535     |
| RAD23 homolog A ( <i>S cerevisiae</i> )                                                                                                      | <i>RAD23A</i>   | 1.924 down | .0205   | 5886    |
| Nuclear receptor coactivator 3                                                                                                               | <i>NCOA3</i>    | 1.924 down | .0496   | 8202    |
| Myelin basic protein                                                                                                                         | <i>MBP</i>      | 1.924 down | .0167   | 4155    |
| Solute carrier family 33 (acetyl-CoA transporter),<br>member 1                                                                               | <i>SLC33A1</i>  | 1.923 down | .0112   | 9197    |
| T-box 5                                                                                                                                      | <i>TBX5</i>     | 1.923 down | .0203   | 6910    |
| DEAH (Asp-Glu-Ala-His) box polypeptide 9                                                                                                     | <i>DHX9</i>     | 1.923 down | .0112   | 1660    |
| Intraflagellar transport 122 homolog ( <i>Chlamydomonas</i> )                                                                                | <i>IFT122</i>   | 1.922 down | .0247   | 55764   |
| Calnexin                                                                                                                                     | <i>CANX</i>     | 1.921 down | .0103   | 821     |
| Rab and DnaJ domain containing                                                                                                               | <i>RBJ</i>      | 1.921 down | .03     | 51277   |
| Hydroxyacyl-coenzyme A dehydrogenase/3-ketoacyl-<br>coenzyme A thiolase/enoyl-coenzyme A hydratase<br>(trifunctional protein), alpha subunit | <i>HADHA</i>    | 1.921 down | .0375   | 3030    |
| Dystonin                                                                                                                                     | <i>DST</i>      | 1.919 down | .0112   | 667     |
| Phosphoinositide-3-kinase, class 2, alpha polypeptide                                                                                        | <i>PIK3C2A</i>  | 1.919 down | .0216   | 5286    |
| ADAM metallopeptidase domain 10                                                                                                              | <i>ADAM10</i>   | 1.918 down | .0433   | 102     |
| Fibronectin type III domain containing 3A                                                                                                    | <i>FNDC3A</i>   | 1.918 down | .00672  | 22862   |
| Spire homolog 1 ( <i>Drosophila</i> )                                                                                                        | <i>SPIRE1</i>   | 1.917 down | .0109   | 56907   |
| RAS and EF-hand domain containing                                                                                                            | <i>RASEF</i>    | 1.917 down | .0401   | 158158  |
| Phosphodiesterase 1C, calmodulin-dependent 70 kd                                                                                             | <i>PDE1C</i>    | 1.916 down | .0136   | 5137    |
| Ring finger protein 19A                                                                                                                      | <i>RNF19A</i>   | 1.916 down | .0112   | 25897   |
| alkB, alkylation repair homolog 5 ( <i>E coli</i> )                                                                                          | <i>ALKBH5</i>   | 1.916 down | .0208   | 54890   |
| zer-1 homolog ( <i>C elegans</i> )                                                                                                           | <i>ZER1</i>     | 1.915 down | .0125   | 10444   |
| Obscurin, cytoskeletal calmodulin and titin-interacting<br>RhoGEF                                                                            | <i>OBSCN</i>    | 1.914 down | .0387   | 84033   |
| Zinc finger with KRAB and SCAN domains 1                                                                                                     | <i>ZKSCAN1</i>  | 1.914 down | .0142   | 7586    |
| Chloride intracellular channel 5                                                                                                             | <i>CLIC5</i>    | 1.913 down | .0391   | 53405   |
| WW domain containing adaptor with coiled-coil                                                                                                | <i>WAC</i>      | 1.913 down | .00669  | 51322   |
| Wolfram syndrome 1 (wolframin)                                                                                                               | <i>WFS1</i>     | 1.912 down | .0492   | 7466    |
| Son of sevenless homolog 1 ( <i>Drosophila</i> )                                                                                             | <i>SOS1</i>     | 1.911 down | .0448   | 6654    |
| Cytoskeleton associated protein 5                                                                                                            | <i>CKAP5</i>    | 1.909 down | .0109   | 9793    |
| Cullin 4B                                                                                                                                    | <i>CUL4B</i>    | 1.909 down | .0204   | 8450    |
| Paired related homeobox 1                                                                                                                    | <i>PRRX1</i>    | 1.908 down | .0262   | 5396    |
| Minichromosome maintenance complex component 3<br>associated protein                                                                         | <i>MCM3AP</i>   | 1.907 down | .0424   | 8888    |
| Sp1 transcription factor                                                                                                                     | <i>SP1</i>      | 1.906 down | .0327   | 6667    |
| Nuclear transcription factor Y, gamma                                                                                                        | <i>NFYC</i>     | 1.904 down | .0239   | 4802    |

TABLE E2. Continued

| Gene title                                                                                                                              | Symbol                                | Fold       | P value | Gene ID            |
|-----------------------------------------------------------------------------------------------------------------------------------------|---------------------------------------|------------|---------|--------------------|
| v-rel reticuloendotheliosis viral oncogene homolog A, nuclear factor of kappa light polypeptide gene enhancer in B-cells 3, p65 (avian) | <i>RELA</i>                           | 1.904 down | .0498   | 5970               |
| Chromosome 5 open reading frame 22                                                                                                      | <i>C5orf22</i>                        | 1.903 down | .0126   | 55322              |
| MYST histone acetyltransferase (monocytic leukemia) 4                                                                                   | <i>MYST4</i>                          | 1.903 down | .0135   | 23522              |
| Iroquois homeobox 5                                                                                                                     | <i>IRX5</i>                           | 1.903 down | .0313   | 10265              |
| Epoxide hydrolase 1, microsomal (xenobiotic)                                                                                            | <i>EPHX1</i>                          | 1.903 down | .0158   | 2052               |
| Microtubule associated monooxygenase, calponin and LIM domain containing 3///similar to Protein MICAL-3                                 | <i>LOC731210</i><br>/// <i>MICAL3</i> | 1.903 down | .0487   | 57553///<br>731210 |
| Putative homeodomain transcription factor 2                                                                                             | <i>PHTF2</i>                          | 1.902 down | .04     | 57157              |
| Mitogen-activated protein kinase kinase kinase 3                                                                                        | <i>MAP3K3</i>                         | 1.901 down | .0458   | 4215               |
| Zinc finger protein 227                                                                                                                 | <i>ZNF227</i>                         | 1.900 down | .0262   | 7770               |
| Membrane associated guanylate kinase, WW and PDZ domain containing 2                                                                    | <i>MAGI2</i>                          | 1.900 down | .035    | 9863               |
| Bicaudal D homolog 2 ( <i>Drosophila</i> )                                                                                              | <i>BICD2</i>                          | 1.900 down | .0232   | 23299              |
| Adducin 1 (alpha)                                                                                                                       | <i>ADD1</i>                           | 1.900 down | .0136   | 118                |
| Plexin B1                                                                                                                               | <i>PLXNB1</i>                         | 1.900 down | .034    | 5364               |
| Adenylate cyclase 9                                                                                                                     | <i>ADCY9</i>                          | 1.899 down | .0163   | 115                |
| Zinc finger CCCH-type containing 7A                                                                                                     | <i>ZC3H7A</i>                         | 1.899 down | .0118   | 29066              |
| TOX high mobility group box family member 4///similar to Epidermal Langerhans cell protein LCP1                                         | <i>LOC285412</i><br>/// <i>TOX4</i>   | 1.899 down | .0263   | 285412///<br>9878  |
| Nucleoporin 98 kd                                                                                                                       | <i>NUP98</i>                          | 1.898 down | .0212   | 4928               |
| Platelet derived growth factor C                                                                                                        | <i>PDGFC</i>                          | 1.897 down | .0461   | 56034              |
| Block of proliferation 1///similar to block of proliferation 1                                                                          | <i>BOP1</i> ///<br><i>LOC727967</i>   | 1.897 down | .0448   | 23246///<br>727967 |
| Obscurin, cytoskeletal calmodulin and titin-interacting RhoGEF                                                                          | <i>OBSCN</i>                          | 1.896 down | .0392   | 84033              |
| guanine nucleotide binding protein (G protein), beta 5                                                                                  | <i>GNB5</i>                           | 1.894 down | .0396   | 10681              |
| Protein tyrosine phosphatase, nonreceptor type 21                                                                                       | <i>PTPN21</i>                         | 1.894 down | .0278   | 11099              |
| Adaptor-related protein complex 3, delta 1 subunit                                                                                      | <i>AP3D1</i>                          | 1.890 down | .0112   | 8943               |
| v-akt murine thymoma viral oncogene homolog 2                                                                                           | <i>AKT2</i>                           | 1.889 down | .0174   | 208                |
| Solute carrier family 25 (mitochondrial carrier; adenine nucleotide translocator), member 6                                             | <i>SLC25A6</i>                        | 1.889 down | .0291   | 293                |
| Zinc finger, DHHC-type containing 5                                                                                                     | <i>ZDHHC5</i>                         | 1.888 down | .0136   | 25921              |
| Latent transforming growth factor beta binding protein 1                                                                                | <i>LTBP1</i>                          | 1.888 down | .0126   | 4052               |
| Rho GTPase activating protein 26                                                                                                        | <i>ARHGAP26</i>                       | 1.887 down | .0245   | 23092              |
| ATPase, class I, type 8B, member 2                                                                                                      | <i>ATP8B2</i>                         | 1.885 down | .0109   | 57198              |
| Tuberous sclerosis 2                                                                                                                    | <i>TSC2</i>                           | 1.885 down | .0281   | 7249               |
| ATPase, class VI, type 11A                                                                                                              | <i>ATP11A</i>                         | 1.884 down | .0107   | 23250              |
| RIO kinase 3 (yeast)                                                                                                                    | <i>RIOK3</i>                          | 1.883 down | .0238   | 8780               |
| Golgi apparatus protein 1                                                                                                               | <i>GLG1</i>                           | 1.882 down | .0234   | 2734               |
| Nicotinamide nucleotide transhydrogenase                                                                                                | <i>NNT</i>                            | 1.880 down | .0106   | 23530              |
| Chromosome 19 open reading frame 6                                                                                                      | <i>C19orf6</i>                        | 1.879 down | .0125   | 91304              |
| Bromodomain containing 2                                                                                                                | <i>BRD2</i>                           | 1.879 down | .0228   | 6046               |
| Purine-rich element binding protein B                                                                                                   | <i>PURB</i>                           | 1.879 down | .0281   | 5814               |
| Glutathione reductase                                                                                                                   | <i>GSR</i>                            | 1.879 down | .00928  | 2936               |
| ADP-ribosylation factor guanine nucleotide-exchange factor 1 (brefeldin A-inhibited)                                                    | <i>ARFGEF1</i>                        | 1.877 down | .00671  | 10565              |
| ADP-ribosylation factor interacting protein 1 (arfaptin 1)                                                                              | <i>ARFIP1</i>                         | 1.877 down | .0116   | 27236              |
| Rhotekin                                                                                                                                | <i>RTKN</i>                           | 1.876 down | .0109   | 6242               |
| Jumonji domain containing 3, histone lysine demethylase                                                                                 | <i>JMJD3</i>                          | 1.875 down | .0102   | 23135              |
| Zinc finger and SCAN domain containing 18                                                                                               | <i>ZSCAN18</i>                        | 1.874 down | .0223   | 65982              |
| Kelch repeat and BTB (POZ) domain containing 4                                                                                          | <i>KBTBD4</i>                         | 1.873 down | .044    | 55709              |
| PRP6 pre-mRNA processing factor 6 homolog ( <i>S cerevisiae</i> )                                                                       | <i>PRPF6</i>                          | 1.872 down | .0132   | 24148              |
| CCR4-NOT transcription complex, subunit 3                                                                                               | <i>CNOT3</i>                          | 1.871 down | .0226   | 4849               |

TABLE E2. Continued

| Gene title                                                                                                          | Symbol   | Fold       | P value | Gene ID |
|---------------------------------------------------------------------------------------------------------------------|----------|------------|---------|---------|
| Zinc finger, RAN-binding domain containing 1                                                                        | ZRANB1   | 1.870 down | .0289   | 54764   |
| Glucosidase, alpha; neutral AB                                                                                      | GANAB    | 1.870 down | .0149   | 23193   |
| Protein tyrosine phosphatase, receptor type, f polypeptide (PTPRF), interacting protein (liprin), alpha 1           | PPFIA1   | 1.870 down | .0281   | 8500    |
| Vitamin K epoxide reductase complex, subunit 1-like 1                                                               | VKORC1L1 | 1.869 down | .0114   | 154807  |
| Ring finger and CCCH-type zinc finger domains 2                                                                     | RC3H2    | 1.869 down | .0112   | 54542   |
| F-box and leucine-rich repeat protein 15                                                                            | FBXL15   | 1.869 down | .0287   | 79176   |
| Zinc finger, FYVE domain containing 9                                                                               | ZFYVE9   | 1.869 down | .0129   | 9372    |
| Transcribed locus                                                                                                   |          | 1.867 down | .0217   |         |
| Trinucleotide repeat containing 6B                                                                                  | TNRC6B   | 1.867 down | .0128   | 23112   |
| Anterior pharynx defective 1 homolog A ( <i>C elegans</i> )                                                         | APH1A    | 1.867 down | .0317   | 51107   |
| Protein phosphatase 5, catalytic subunit                                                                            | PPP5C    | 1.866 down | .0448   | 5536    |
| Zinc finger protein 289, ID1 regulated                                                                              | ZNF289   | 1.866 down | .0462   | 84364   |
| UDP-N-acetyl-alpha-D-galactosamine:polypeptide N-acetylgalactosaminyltransferase 2 (GalNAc-T2)                      | GALNT2   | 1.865 down | .0191   | 2590    |
| Solute carrier family 25, member 30                                                                                 | SLC25A30 | 1.864 down | .0372   | 253512  |
| Kelch-like 23 ( <i>Drosophila</i> )                                                                                 | KLHL23   | 1.864 down | .0281   | 151230  |
| RAB3 GTPase activating protein subunit 2 (non-catalytic)                                                            | RAB3GAP2 | 1.862 down | .0129   | 25782   |
| Ring finger and CCCH-type zinc finger domains 2                                                                     | RC3H2    | 1.861 down | .0128   | 54542   |
| Phospholipase C, beta 4                                                                                             | PLCB4    | 1.859 down | .016    | 5332    |
| Glucosidase, beta (bile acid) 2                                                                                     | GBA2     | 1.858 down | .0134   | 57704   |
| Cyclin-dependent kinase inhibitor 1C (p57, Kip2)                                                                    | CDKN1C   | 1.858 down | .0266   | 1028    |
| WWC family member 3                                                                                                 | WWC3     | 1.857 down | .0109   | 55841   |
| Tripeptidyl peptidase I                                                                                             | TPP1     | 1.856 down | .0294   | 1200    |
| CD99 molecule-like 2                                                                                                | CD99L2   | 1.855 down | .0203   | 83692   |
| Zinc finger protein 655                                                                                             | ZNF655   | 1.853 down | .0226   | 79027   |
| Actin filament associated protein 1-like 1                                                                          | AFAP1L1  | 1.853 down | .016    | 134265  |
| Eukaryotic translation initiation factor 4B                                                                         | EIF4B    | 1.852 down | .0112   | 1975    |
| p21 (CDKN1A)-activated kinase 2                                                                                     | PAK2     | 1.852 down | .0125   | 5062    |
| Poliovirus receptor                                                                                                 | PVR      | 1.852 down | .00712  | 5817    |
| RAB3 GTPase activating protein subunit 1 (catalytic)                                                                | RAB3GAP1 | 1.852 down | .0274   | 22930   |
| Interleukin enhancer binding factor 3, 90 kd                                                                        | ILF3     | 1.851 down | .0116   | 3609    |
| Chromosome 6 open reading frame 106                                                                                 | C6orf106 | 1.850 down | .03     | 64771   |
| Purine-rich element binding protein A                                                                               | PURA     | 1.850 down | .0384   | 5813    |
| Wolf-Hirschhorn syndrome candidate 1-like 1                                                                         | WHSC1L1  | 1.849 down | .0167   | 54904   |
| Fem-1 homolog b ( <i>C elegans</i> )                                                                                | FEM1B    | 1.849 down | .0214   | 10116   |
| Jun oncogene                                                                                                        | JUN      | 1.848 down | .0243   | 3725    |
| NDRG family member 2                                                                                                | NDRG2    | 1.848 down | .0415   | 57447   |
| Protocadherin gamma subfamily A, 1                                                                                  | PCDHGA1  | 1.847 down | .0112   | 9708    |
| Solute carrier family 6 (neurotransmitter transporter, creatine), member 8                                          | SLC6A8   | 1.847 down | .0266   | 6535    |
| Upstream binding transcription factor, RNA polymerase I                                                             | UBTF     | 1.847 down | .0227   | 7343    |
| Zer-1 homolog ( <i>C elegans</i> )                                                                                  | ZER1     | 1.846 down | .0166   | 10444   |
| Prion protein (p27-30) (Creutzfeldt-Jakob disease, Gerstmann-Strausler-Scheinker syndrome, fatal familial insomnia) | PRNP     | 1.845 down | .0168   | 5621    |
| General transcription factor IIIC, polypeptide 1, alpha 220 kd                                                      | GTF3C1   | 1.844 down | .0274   | 2975    |
| Pumilio homolog 1 ( <i>Drosophila</i> )                                                                             | PUM1     | 1.843 down | .0257   | 9698    |
| Splicing factor, arginine/serine-rich 1 (splicing factor 2, alternate splicing factor)                              | SFRS1    | 1.842 down | .0158   | 6426    |
| Kelch repeat and BTB (POZ) domain containing 2                                                                      | KBTBD2   | 1.842 down | .0124   | 25948   |
| Translocase of inner mitochondrial membrane 44 homolog (yeast)                                                      | TIMM44   | 1.841 down | .0241   | 10469   |
| 1-Acylglycerol-3-phosphate O-acyltransferase 3                                                                      | AGPAT3   | 1.841 down | .011    | 56894   |



TABLE E2. Continued

| Gene title                                                                                                                                                                              | Symbol                                                    | Fold       | P value | Gene ID                         |
|-----------------------------------------------------------------------------------------------------------------------------------------------------------------------------------------|-----------------------------------------------------------|------------|---------|---------------------------------|
| Ezrin                                                                                                                                                                                   | <i>EZR</i>                                                | 1.840 down | .0279   | 7430                            |
| Down syndrome critical region gene 3                                                                                                                                                    | <i>DSCR3</i>                                              | 1.840 down | .0355   | 10311                           |
| v-ets erythroblastosis virus E26 oncogene homolog 1 (avian)                                                                                                                             | <i>ETS1</i>                                               | 1.839 down | .0347   | 2113                            |
| Ubiquitin-conjugating enzyme E2S///similar to ubiquitin-conjugating enzyme E2S (Ubiquitin-conjugating enzyme E2-24 kd) (Ubiquitin-protein ligase) (Ubiquitin carrier protein) (E2-EPF5) | <i>LOC731049</i><br><i>///UBE2S</i>                       | 1.839 down | .049    | 27338///<br>731049              |
| Solute carrier family 6 (neurotransmitter transporter, creatine), member 8                                                                                                              | <i>SLC6A8</i>                                             | 1.837 down | .0172   | 6535                            |
| Minichromosome maintenance complex component 3 associated protein                                                                                                                       | <i>MCM3AP</i>                                             | 1.835 down | .017    | 8888                            |
| Glucocorticoid receptor DNA binding factor 1                                                                                                                                            | <i>GRLF1</i>                                              | 1.834 down | .0218   | 2909                            |
| Aryl hydrocarbon receptor nuclear translocator                                                                                                                                          | <i>ARNT</i>                                               | 1.832 down | .0179   | 405                             |
| Integrin, alpha 6                                                                                                                                                                       | <i>ITGA6</i>                                              | 1.832 down | .0394   | 3655                            |
| La ribonucleoprotein domain family, member 5                                                                                                                                            | <i>LARP5</i>                                              | 1.831 down | .0238   | 23185                           |
| Heat shock transcription factor 1                                                                                                                                                       | <i>HSF1</i>                                               | 1.831 down | .0255   | 3297                            |
| DCP1 decapping enzyme homolog A ( <i>S cerevisiae</i> )                                                                                                                                 | <i>DCP1A</i>                                              | 1.829 down | .0142   | 55802                           |
| Sterile alpha motif domain containing 4A                                                                                                                                                | <i>SAMD4A</i>                                             | 1.829 down | .0121   | 23034                           |
| Desmin                                                                                                                                                                                  | <i>DES</i>                                                | 1.829 down | .0484   | 1674                            |
| KIAA1826                                                                                                                                                                                | <i>KIAA1826</i>                                           | 1.828 down | .0423   | 84437                           |
| Microtubule associated serine/threonine kinase family member 4                                                                                                                          | <i>MAST4</i>                                              | 1.828 down | .0448   | 375449                          |
| Nuclear factor I/C (CCAAT-binding transcription factor)                                                                                                                                 | <i>NFIC</i>                                               | 1.828 down | .0119   | 4782                            |
| Heat shock 70 kd protein 4                                                                                                                                                              | <i>HSPA4</i>                                              | 1.828 down | .0167   | 3308                            |
| Forkhead box O3                                                                                                                                                                         | <i>FOXO3</i>                                              | 1.827 down | .024    | 2309                            |
| Core-binding factor, beta subunit                                                                                                                                                       | <i>CBFB</i>                                               | 1.825 down | .0121   | 865                             |
| Mitogen-activated protein kinase kinase 2                                                                                                                                               | <i>MAP2K2</i>                                             | 1.822 down | .0295   | 5605                            |
| RRN3 RNA polymerase I transcription factor homolog ( <i>S cerevisiae</i> )///RRN3 RNA polymerase I transcription factor homolog ( <i>S cerevisiae</i> ) pseudogene                      | <i>LOC653390///</i><br><i>LOC730092</i><br><i>///RRN3</i> | 1.822 down | .0307   | 54700///<br>653390///<br>730092 |
| GCN1 general control of amino-acid synthesis 1-like 1 (yeast)                                                                                                                           | <i>GCN1L1</i>                                             | 1.822 down | .0242   | 10985                           |
| Cullin 5                                                                                                                                                                                | <i>CUL5</i>                                               | 1.821 down | .0119   | 8065                            |
| CDNA FLJ34585 fis, clone KIDNE2008758                                                                                                                                                   |                                                           | 1.821 down | .0142   |                                 |
| Related RAS viral (r-ras) oncogene homolog 2                                                                                                                                            | <i>RRAS2</i>                                              | 1.820 down | .0206   | 22800                           |
| MAX dimerization protein 4                                                                                                                                                              | <i>MXD4</i>                                               | 1.820 down | .0161   | 10608                           |
| Transglutaminase 2 (C polypeptide, protein-glutamine-gamma-glutamyltransferase)                                                                                                         | <i>TGM2</i>                                               | 1.820 down | .0419   | 7052                            |
| Collagen, type IV, alpha 1                                                                                                                                                              | <i>COL4A1</i>                                             | 1.820 down | .0216   | 1282                            |
| Polymerase I and transcript release factor                                                                                                                                              | <i>PTRF</i>                                               | 1.819 down | .0286   | 284119                          |
| Methyl-CpG binding domain protein 1                                                                                                                                                     | <i>MBD1</i>                                               | 1.819 down | .0245   | 4152                            |
| BTG family, member 2                                                                                                                                                                    | <i>BTG2</i>                                               | 1.819 down | .0337   | 7832                            |
| G protein-coupled receptor kinase 5                                                                                                                                                     | <i>GRK5</i>                                               | 1.819 down | .0452   | 2869                            |
| Protein associated with topoisomerase II homolog 1 (yeast)                                                                                                                              | <i>PATL1</i>                                              | 1.818 down | .0147   | 219988                          |
| Interleukin enhancer binding factor 3, 90 kd                                                                                                                                            | <i>ILF3</i>                                               | 1.818 down | .0328   | 3609                            |
| Ras homolog gene family, member J                                                                                                                                                       | <i>RHOJ</i>                                               | 1.817 down | .0278   | 57381                           |
| Chromosome 10 open reading frame 18                                                                                                                                                     | <i>C10orf18</i>                                           | 1.817 down | .0136   | 54906                           |
| NMDA receptor regulated 2                                                                                                                                                               | <i>NARG2</i>                                              | 1.817 down | .0424   | 79664                           |
| Transcription factor 25 (basic helix-loop-helix)                                                                                                                                        | <i>TCF25</i>                                              | 1.817 down | .0142   | 22980                           |
| Spastic paraplegia 7 (pure and complicated autosomal recessive)                                                                                                                         | <i>SPG7</i>                                               | 1.817 down | .0368   | 6687                            |
| Heterogeneous nuclear ribonucleoprotein M                                                                                                                                               | <i>HNRPM</i>                                              | 1.815 down | .0206   | 4670                            |
| Fidgetin                                                                                                                                                                                | <i>FIGN</i>                                               | 1.814 down | .0484   | 55137                           |
| Chromosome 5 open reading frame 41                                                                                                                                                      | <i>C5orf41</i>                                            | 1.814 down | .049    | 153222                          |
| SMAD specific E3 ubiquitin protein ligase 1                                                                                                                                             | <i>SMURF1</i>                                             | 1.812 down | .0237   | 57154                           |
| Cold inducible RNA binding protein                                                                                                                                                      | <i>CIRBP</i>                                              | 1.812 down | .04     | 1153                            |

TABLE E2. Continued

| Gene title                                                                                                | Symbol          | Fold       | P value | Gene ID |
|-----------------------------------------------------------------------------------------------------------|-----------------|------------|---------|---------|
| SLAIN motif family, member 2                                                                              | <i>SLAIN2</i>   | 1.812 down | .0309   | 57606   |
| Required for meiotic nuclear division 5 homolog<br>A ( <i>S cerevisiae</i> )                              | <i>RMND5A</i>   | 1.811 down | .0383   | 64795   |
| SH3 domain protein D19                                                                                    | <i>SH3D19</i>   | 1.811 down | .0445   | 152503  |
| Pericentriolar material 1                                                                                 | <i>PCMI</i>     | 1.810 down | .00823  | 5108    |
| Quaking homolog, KH domain RNA binding (mouse)                                                            | <i>QKI</i>      | 1.810 down | .0266   | 9444    |
| Insulin-degrading enzyme                                                                                  | <i>IDE</i>      | 1.809 down | .0192   | 3416    |
| zinc finger, HIT type 4                                                                                   | <i>ZNHIT4</i>   | 1.808 down | .018    | 83444   |
| T-box 5                                                                                                   | <i>TBX5</i>     | 1.808 down | .0128   | 6910    |
| Myeloid/lymphoid or mixed-lineage leukemia<br>(trithorax homolog, <i>Drosophila</i> ); translocated to, 4 | <i>MLLT4</i>    | 1.807 down | .0283   | 4301    |
| Myosin regulatory light chain interacting protein                                                         | <i>MYLIP</i>    | 1.807 down | .031    | 29116   |
| Phosphate cytidylyltransferase 1, choline, alpha                                                          | <i>PCYT1A</i>   | 1.806 down | .0208   | 5130    |
| RNA binding motif protein 8A                                                                              | <i>RBM8A</i>    | 1.805 down | .0339   | 9939    |
| Protein kinase C and casein kinase substrate in neurons 2                                                 | <i>PAC SIN2</i> | 1.804 down | .0284   | 11252   |
| Polymerase (RNA) II (DNA directed) polypeptide E, 25 kd                                                   | <i>POLR2E</i>   | 1.804 down | .0356   | 5434    |
| Stromal antigen 2                                                                                         | <i>STAG2</i>    | 1.804 down | .0203   | 10735   |
| Chromosome 1 open reading frame 71                                                                        | <i>C1orf71</i>  | 1.803 down | .0187   | 163882  |
| Transmembrane protein 127                                                                                 | <i>TMEM127</i>  | 1.803 down | .0244   | 55654   |
| Valyl-tRNA synthetase                                                                                     | <i>VARS</i>     | 1.802 down | .0291   | 7407    |
| prosaposin (variant Gaucher disease and variant<br>metachromatic leukodystrophy)                          | <i>PSAP</i>     | 1.801 down | .0324   | 5660    |
| Zinc finger protein 12                                                                                    | <i>ZNF12</i>    | 1.800 down | .0384   | 7559    |
